# Large-scale signal and noise correlations configure multi-task coding in human brain networks

Takuya Ito<sup>1</sup> and John D. Murray<sup>1,2,3,\*</sup>

<sup>1</sup>Department of Psychiatry, Yale School of Medicine, New Haven, CT, USA

<sup>2</sup>Department of Neuroscience, Yale School of Medicine, New Haven, CT, USA

<sup>3</sup>Department of Physics, Yale University, New Haven, CT, USA

\*john.murray@yale.edu

## ABSTRACT

The brain is a complex system with dynamic network changes. Prior studies in theoretical neuroscience have demonstrated that state-dependent neural correlations can be understood from a neural coding framework. These so-called noise correlations – the trial-to-trial or moment-to-moment co-variability – can be interpreted only if the underlying signal correlation – the similarity of task selectivity between pairs of neural units – is known. While the impact of these correlations on task coding have been widely investigated in local spiking circuits, it remains unclear how this coding framework applies to large-scale brain networks. Here we investigate the relationship between large-scale noise correlations and their underlying signal correlations in a multi-task human fMRI dataset. We found that state-dependent noise correlation changes do not typically align in the same direction as their underlying signal correlation, suggesting that 1) trial-by-trial noise is typically reduced between similarly tuned regions, and 2) stimulus-driven activity does not linearly superimpose atop the network's underlying background activity. Crucially, we discovered that noise correlations that changed in the opposite direction as their signal correlation (i.e., anti-aligned correlations) improved the information coding of these brain regions. In contrast, noise correlation changes that were aligned with their signal correlation did not. These aligned noise correlations were primarily correlation increases, which have been commonly (yet incorrectly) assumed to increase information communication between brain regions in human neuroimaging studies. These findings illustrate that state-dependent noise correlations contribute to the information coding of functional brain networks, but interpretation of these correlation changes requires knowledge of the underlying signal correlations.

## 1 Introduction

2 Advances in functional brain imaging have enabled the investigation of the large-scale network organization of the human brain.  
3 In resting-state functional magnetic resonance imaging (fMRI), studies have found highly reliable and modular functional  
4 connectivity (FC) organization, which is measured through correlating the spontaneous fMRI activity of different brain regions  
5 (Power et al., 2011; Yeo et al., 2011). Related work has shown that this overall network organization persists across task states  
6 (Cole et al., 2014; Gonzalez-Castillo and Bandettini, 2017; Krienen et al., 2014), disease states (Spronk et al., 2021), and  
7 individuals (Gratton et al., 2018). Despite the appearance of a state- and trait-invariant network organization, there are reliable  
8 changes that occur to the network organization for specific networks or regions (Cole et al., 2014; Krienen et al., 2014; Shine  
9 et al., 2016). While some recent methodological efforts in human brain imaging have worked to disambiguate the sources of  
10 state-specific network correlation changes (Cole et al., 2016; Duff et al., 2018), the significance and interpretation of these  
11 correlation changes remain unclear.

12 In parallel, empirical and theoretical neurophysiological studies have established a rigorous statistical framework to study  
13 the properties of neural correlations and how they impact neural coding (Moreno-Bote et al., 2014; Panzeri et al., 2022;  
14 da Silveira and Berry, 2014). Critically, there are two forms of correlated activity that contain distinct sources of variance within  
15 neural data, yet provide complementary information about task coding: the signal correlation (SC) and the noise correlation  
16 (NC) (Cohen and Kohn, 2011). Intuitively, SC measures the similarity of the task selectivity or tuning curves of a pair of  
17 neural units. NC measures the correlation of trial-to-trial variability of the same task/stimulus (Fig. 1c), capturing the dynamic  
18 interaction of two units in response to a task. (Note that the terms SC and NC were originally defined through the lens of  
19 information theory, where “signal” corresponds to the mean across responses, and “noise” corresponds to the variance across  
20 responses; (MacKay, 2003). In the context of prior fMRI literature, these SCs and NCs are statistically equivalent to across-task  
21 co-activations and FC, respectively (Cole et al., 2019).) Under the theoretical neural coding framework, studies have suggested  
22 that the effect a NC has on task coding depends on how well it aligns with the underlying SC of those two units (Moreno-Bote  
23 et al., 2014; Panzeri et al., 2022; da Silveira and Berry, 2014). In particular, the signal-noise angle – the difference in the  
24 directions of the SC and NC – determines the information coding properties of a neural population (Panzeri et al., 2022).

25 This is because if an NC aligns with its SC, this would interfere with the coding direction of these two units. While the  
 26 theoretical account of SC/NC was developed to account for empirical phenomena observed at the level of neuron pairs during  
 27 the presentation of fine-grained sensory stimuli (Cohen and Kohn, 2011; Moreno-Bote et al., 2014; da Silveira and Berry, 2014),  
 28 the statistical principles are generic to account for neural data across a wide range of spatial and cognitive scales, including  
 29 fMRI data. Thus, we sought to investigate whether the SC/NC coding principles apply to the level of large-scale brain regions.  
 30 A successful demonstration of SC/NC coding principles at the level of human functional brain networks would bridge the vast  
 31 literature of FC analyses prevalent in the human functional connectomics literature with the rich neural coding framework  
 32 developed in theoretical neuroscience.

33 SCs capture the similarity of task selectivity between two neural units (neurons or brain regions). At the level of single  
 34 neurons, this typically captures the similarity of tuning curves between fine-grained sensory stimuli, such as the orientation  
 35 of visual gratings (Cohen and Maunsell, 2009). While the impact of these correlations on task coding have been widely  
 36 investigated in local spiking circuits, it remains unclear how this coding framework applies to large-scale brain networks. This  
 37 is largely due to the fact that the types of fine-grained tuning curves (i.e., orientation gratings) captured in prior neurophysiology  
 38 studies are generally inaccessible at the level of large-scale fMRI brain networks. Instead, large-scale fMRI brain networks  
 39 have been previously shown to be selective to broader cognitive tuning curves, such as different cognitive tasks (Yeo et al.,  
 40 2015; Smith et al., 2009). Here we leverage a multi-task dataset that spans diverse cognitive domains to characterize the SC and  
 41 NC organization across distributed functional brain networks. This approach plays to the strengths of fMRI, while allowing us  
 42 to extend the prior theoretical neural coding framework to large-scale functional brain networks.

43 Here we characterize the organization of SC and NC in large-scale human brain networks, and assess their coding properties  
 44 across a wide range of cognitive tasks. While prior human neuroimaging studies primarily viewed correlations (i.e., FC) through  
 45 the lens of dynamic communication (for a review, see Gonzalez-Castillo and Bandettini (2017)), we test whether FC can be  
 46 interpreted through the lens of information coding. (Since FC and NC are statistically equivalent, we use them interchangeably  
 47 in this study; see Table 1.) First, we extend the notion of SC from the correlation of visual tuning curves to a wide variety of  
 48 cognitive tasks (i.e., *cognitive tuning curves*). We compared the organization of SC to the well-established resting-state NC  
 49 (rNC) organization of human cortex, finding that SC reflected a more modular and segregated network organization than rNC.  
 50 Next, we built a statistical model of NC which demonstrated that, under the assumption that observed NC is driven by a linear  
 51 combination of internal neural and external task sources, NCs should exclusively change in the direction of their underlying  
 52 SC (i.e., positive increases in NC should be observed when the SC is positive). In contrast to this assumption, we found  
 53 that NC changes do not typically align with the underlying SC in empirical fMRI data. Instead, a majority of NCs changed  
 54 in the direction that was opposite to the SC. To understand the functional relevance of these NC changes, we leveraged the  
 55 hypothesis from theoretical neuroscience that the alignment of the signal and noise correlations impacts the fidelity of task  
 56 information coding. Indeed, we found that the signal-noise relationship is predictive of the fidelity of task coding in large-scale  
 57 brain networks. These results shed light on the relationship between neural correlations and information coding, placing fMRI  
 58 functional connectomics within the broader neural coding framework.

| Name                                  | Abbreviation | Interpretation                                       |
|---------------------------------------|--------------|------------------------------------------------------|
| Signal correlation                    | SC           | Similarity of task selectivity                       |
| Cross-task co-activations             | n/a          | <i>Across-task correlation of mean activations</i>   |
| Noise correlation                     | NC           | Neural/dynamic interactions                          |
| Functional connectivity               | FC           | <i>Correlation of ongoing activity</i>               |
| Resting-state noise correlations      | rNC          | Spontaneous interactions/correlations                |
| Resting-state functional connectivity | rFC          | <i>Correlation of ongoing spontaneous variance</i>   |
| Task-state noise correlations         | tNC          | Task-state interactions/correlations                 |
| Task-state functional connectivity    | tFC          | <i>Correlation of ongoing task-driven variance</i>   |
| Noise correlation change              | $\Delta$ NC  | Task versus rest/baseline correlation change         |
| Task vs rest FC change                | $\Delta$ FC  | <i>Difference between task and rest correlations</i> |

**Table 1.** Table of definitions and abbreviations. Distinct terms used in different subfields within neuroscience are often computed identically and have converging interpretations. For example, noise correlations and functional connectivity are computed in a statistically identical manner, and aim to capture a similar empirical phenomenon: interaction of neural units.

## 59 Results

### 60 Estimating multi-task SCs and NCs in human functional brain networks

61 We first characterized multi-task SC and NC across all pairs of parcels (see Table 1 for definitions). We used the publicly  
62 available multi-domain task battery dataset collected by King and colleagues (King et al., 2019). Briefly, the multi-domain task  
63 battery dataset contains 26 cognitive tasks per participant (Fig. 1a). Tasks were interleaved across blocks, where each block  
64 was preceded by a 5s instruction screen, followed by a 30s block. For our analyses, we modeled the mean activity of each block  
65 separately for every brain region (parcel) in the Glasser atlas (Glasser et al., 2016) using a beta series regression (Rissman et al.,  
66 2004) (Fig. 1c).

67 To compute the SC between all pairs of parcels, we first computed the mean activation across blocks for each task separately  
68 (Fig. 1d). This yielded a 360 parcel by 26 task matrix, from which we computed the SC matrix (Fig. 1e). NC was calculated  
69 using the cross-block variability for every parcel, which is a distinct statistical property to the cross-block mean. (Note every  
70 task had the same number of blocks.) We calculated the NC between all pairs of brain regions, and across all tasks (Fig. 1f). To  
71 get a task-state NC (tNC) matrix, we averaged the NC across all tasks (excluding the resting-state condition). Resting-state  
72 blocks were also interleaved throughout the experimental design. To maintain consistency with how resting-state and task-state  
73 NC were computed, resting-state NC (rNC) was computed in an identical manner to tNC (i.e., using a beta series regression)  
74 (Fig. 1g). Note that the across-block rNC matrix estimated here is quantitatively similar to the more common rNC that is  
75 computed across timepoints in the human neuroimaging literature (Supplementary Fig. 1). Conceptually, the approaches are  
76 equivalent in that NCs capture the variability across task responses, and SCs capture the mean across task responses. Here we  
77 opt for cross-block analysis, since it enables the characterization of task coding for each block, rather than across timepoints.

### 78 SCs reveal a highly modular and segregated network organization

79 We characterized the SC matrix in the context of the well-known rNC matrix. Prior work in rNC studies revealed a modular  
80 organization of functional brain networks (Fig. 2a,c) (Ji et al., 2019; Power et al., 2011; Yeo et al., 2011). These functional  
81 network divisions were identified using clustering and community detection algorithms on resting-state NC matrices. To  
82 evaluate how SC was related to this modular network organization, we computed the modularity and segregation of SC with  
83 respect to the previously-defined resting-state network partitions (Fig. 2a). Modularity and segregation are related statistics that  
84 measure the strength of nodes within a network relative to the between-network connection strength (see Methods). Surprisingly,  
85 while the network partitions were optimized to maximize modularity from resting-state NC data, we found that SC had both  
86 higher modularity and segregation than resting-state NC (Fig. 2c). This suggests that SC can recapitulate the well-known  
87 functional subdivisions of cortex that are extracted from resting-state NC.

### 88 Cortical SCs are organized along a gradient of functional specialization

89 Complementing network analyses of SC and NC, gradient analysis offers a way to capture the greatest axes of variation  
90 of the entire SC and NC matrices (Margulies et al., 2016; Huntenburg et al., 2018). Gradient organization is computed by  
91 performing dimensionality reduction on the SC (or NC) matrices (e.g., a principal component analysis), and is complementary  
92 to network partitions as they exhibit smooth loadings/partitions, rather than “hard” or non-overlapping networks (Huntenburg  
93 et al., 2018). The first gradient of the rNC matrix, which is equivalent to its first principal component, is the well-documented  
94 sensorimotor-association (or unimodal-transmodal) hierarchy that was first described by Mesulam (Mesulam, 1998), and  
95 subsequently identified in fMRI data (Margulies et al., 2016) (Fig. 2f). This unimodal-transmodal gradient is related to  
96 both transcriptomic variation (Burt et al., 2018) and myelination content, which is captured in the T1w/T2w contrast map  
97 (Glasser and Van Essen, 2011) (26.1% variance explained; Supplementary Fig. 2h). However, gradient analysis of the SC  
98 matrix revealed a gradient of functional specialization, from sensory-association-motor areas (23.0% variance explained;  
99 Fig. 2e; see Supplementary Fig. 2 for additional details.). Critically, when grouping together cortical systems into sensory,  
100 association, and motor systems (Fig. 2i) – systems that are functionally distinct/specialized from each other – we found a  
101 monotonic relationship between these systems and their gradient loading. This is consistent with a gradient of functional  
102 specialization, where sensory and motor regions are defined by distinct functions, while association regions integrate the two  
103 (Ito and Murray, 2021). Moreover, this sensory-to-motor SC gradient was significantly associated with the 2nd principal  
104 gradient of rNC (rank  $r=0.72$ , non-parametric  $p<0.001$ ) (Fig. 2h). By comparison, the SC gradient was not correlated with  
105 the typical unimodal-transmodal gradient (i.e., the 1st rNC principal gradient; rank  $r=0.29$ ,  $p=0.16$ ). Together, these results  
106 illustrate that while SC preserves the overall functional brain network organization, it reveals a more cognitively specialized  
107 organization that more clearly delineates functionally specialized regions. This is consistent with the notion that SCs capture  
108 task selectivity similarities between brain regions.

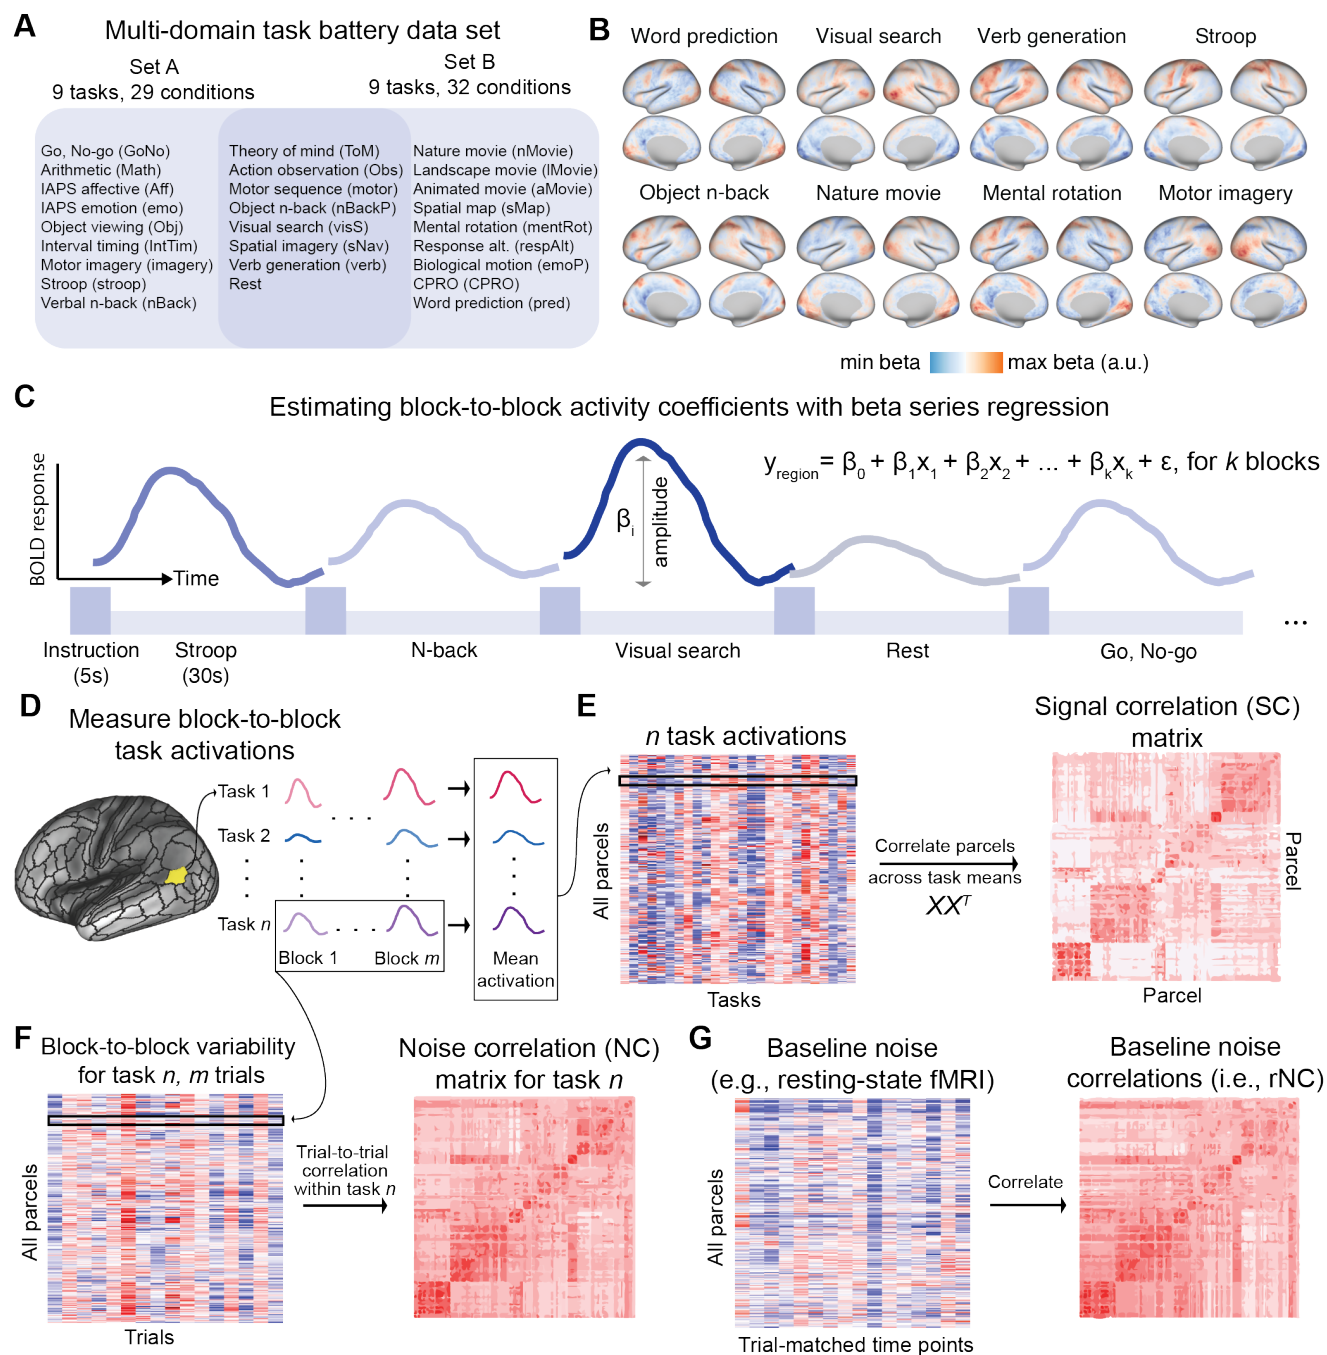

**Figure 1.** We used a multi-task dataset to capture the large-scale SC and NC organization in human functional brain networks. a) The MDTB dataset with 26 unique tasks (King et al., 2019). b) Cortical activation maps for eight example tasks. c) Block-wise activation estimates were obtained using a beta series regression approach, where each task block was modeled independently in a linear regression model (Rissman et al., 2004). d) SCs and NCs in large-scale fMRI data are estimated from orthogonal timeseries sources. We estimate the trial-to-trial task activation amplitude in fMRI data for each region, and for all tasks. e) To estimate the SC matrix, we compute the correlation between all pairs of brain parcels using the cross-trial mean activation of many tasks. f) In contrast, NC matrices for a given task is computed as the correlation of trial-to-trial variability between pairs of parcels within a single task. g) The NC for a task can be compared to the well-studied baseline rNC using resting-state fMRI activity. SCs and NCs are computed for each participant separately, and then averaged to produce a group-level matrix estimate.

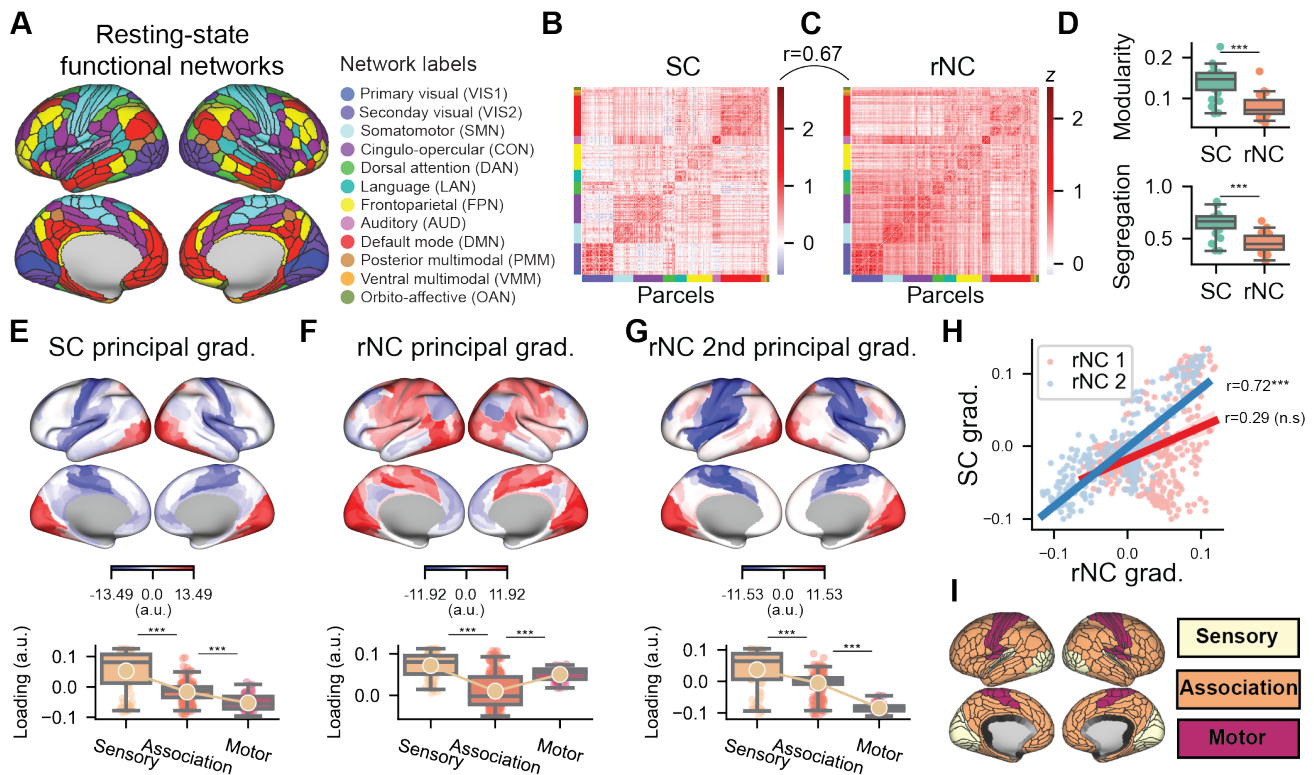

**Figure 2.** Comparing the SC matrix to the well-studied rNC matrix. a) We used the Glasser parcellation with 360 cortical parcels. Parcels were partitioned into 12 functional networks (Ji et al., 2019). b) The SC matrix, which captures the task tuning similarity between pairs of brain regions. c) The rNC matrix. d) Modularity and segregation (using the Ji et al. partition) of the SC and rNC matrices. e) Top: The first principal component of the SC matrix aligns along a sensory-association-motor gradient. Bottom: Average loading projected onto three cortical systems. f) The first principal component of the rNC is organized along the unimodal-transmodal (i.e., sensorimotor-association) hierarchy. g) The second principal component of the rNC matrix also aligns along a sensory-to-motor gradient, and is h) highly correlated with the SC principal gradient. i) Sensory, association, and motor systems projected onto the cortex. A full comparison of the first three gradients of the SC and rNC can be found in Supplementary Fig. 2.

## 109 A linear model of state-specific SC and NC changes

110 A brain region's functional specificity emerges from its pattern of connectivity, i.e., its connectivity fingerprint (Passingham  
 111 et al., 2002; Mars et al., 2018). Thus, two regions with similar functions or tuning curves (i.e., high positive SC) are likely to  
 112 have high amounts of shared spontaneous activity (due to strong functional connections; i.e., high positive rNC). We verified  
 113 this in our empirical data, finding that the SC matrix had overall strong correspondence with rNC (rank  $r=0.67$ ,  $p<0.0001$ ; Fig.  
 114 2b,c). However, how should stimulus-driven activity interact with spontaneous activity? To gain intuition on the interaction  
 115 between stimulus-driven and spontaneous activity, we constructed a statistical model to simulate how state-specific NC emerges  
 116 from an anatomically-constrained network model with linear dynamics.

117 We constructed a linear statistical model with 360 units and 10 networks (36 units per network). A unit's activity was  
 118 determined by the algebraic sum between shared baseline activity (shared between units in the same network), stimulus-driven  
 119 noise, private noise (for each unit separately), and a globally shared signal (inducing positive correlations between all units)  
 120 (Fig. 3a-c). We found that this model produced positively correlated activity amongst all pairs of units (mimicking our empirical  
 121 data), with greater correlation between units within the same network (i.e., shared connections; Fig. 3c). Critically, when  
 122 including an additional stimulus-driven component, this primarily increased the magnitude of correlation primarily between  
 123 strongly connected units (Fig. 3f). This model indicates that under the assumption of linearity, neural units that receive shared  
 124 input drive should increase the magnitude of their correlated activity. In other words, with the addition of a new stimulus-drive,  
 125 the state-dependent  $\Delta$ NC should align with the strength of the underlying SC.

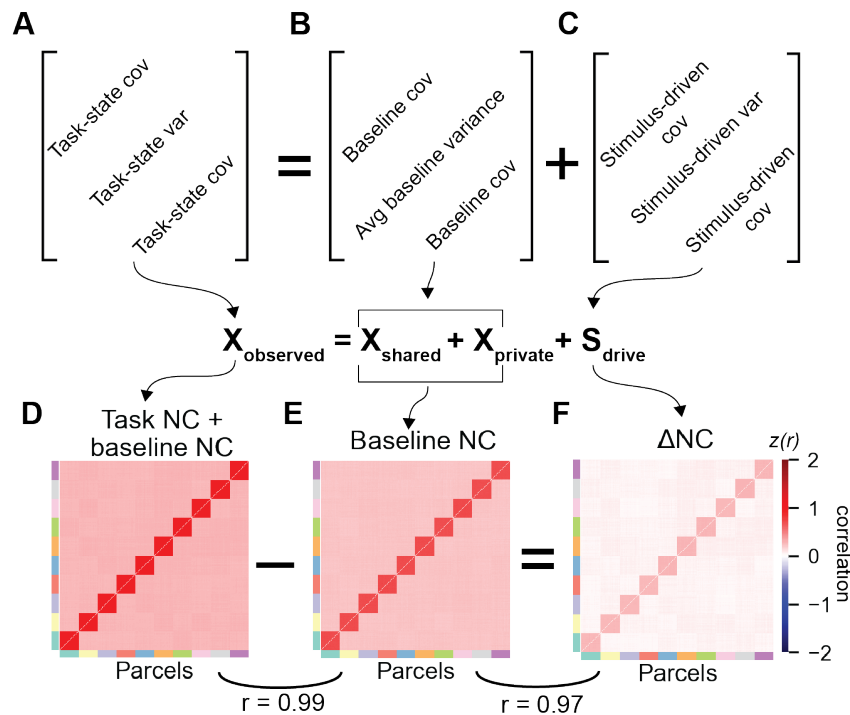

**Figure 3.** A linear model predicts that state-related NC can be decomposed into separable components. We constructed a simple network model with 360 units and 10 connected networks. To obtain a) task-state correlated activity, linear dynamics were superimposed atop anatomical connectivity with b) baseline shared variance and c) stimulus-driven noise. Under these assumptions the difference between the d) observed task-state NC and the e) baseline (or resting-state) NC yields the f) stimulus-driven component of correlated activity in empirical (or simulated) data.

### NC changes do not typically align with the underlying SC in empirical data

126 The statistical model provided an intuition of what should be expected if spontaneous and task-driven variance linearly interact.  
 127 We next sought to characterize the relationship between SC and state-related NCs in empirical data. We characterized the  
 128 rNC, task-state NC, and the  $\Delta$ NC between the two (Fig. 4a-c). Consistent with prior work (Ito et al., 2020), we found that  
 129 the overall change in correlation was dominated by correlation decreases. We computed the signal-noise differential matrix,  
 130 which we defined as the Hadamard (element-wise) matrix multiplication of the SC matrix (Fig. 4d) with the  $\Delta$ NC matrix  
 131 (Fig. 4c). Note that we calculated the signal-noise differential matrix using the  $\Delta$ NC matrix since we wanted to understand  
 132 the impact of state-dependent changes in NC relative to ongoing spontaneous activity. Contrary to the statistical model and  
 133 other studies arguing that NC dynamics are linear (Nozari et al., 2020), we found that most state-related  $\Delta$ NC did not align  
 134 with its underlying SC (aligned  $\Delta$ NC pairs=42.99%; anti-aligned  $\Delta$ NC pairs=56.74%; Fig. 4f). This suggests that the majority  
 135 state-related  $\Delta$ NC changes cannot be explained by the linear superposition of stimulus-driven and spontaneous activity.  
 136

137 We next characterized the network organization of aligned and anti-aligned  $\Delta$ NCs. While the majority of networks were  
 138 dominated by anti-aligned  $\Delta$ NCs, the Default Mode Network (DMN) was instead dominated by aligned  $\Delta$ NC pairs (Fig. 4g-i).  
 139 The DMN, which primarily consists of the medial prefrontal cortex and posterior cingulate, has previously been shown to  
 140 suppress its activity during task performance (Dosenbach et al., 2007; Raichle et al., 2001). Prior work characterizing the impact  
 141 of NCs on neural coding suggest that an aligned signal-noise differential inhibits information coding due to the interference of  
 142 the correlated noise along the coding (signal) axis (Panzeri et al., 2022). This predicts that the  $\Delta$ NC increases associated with  
 143 the DMN (Fig. 4c) may inhibit the coding of task-related information. In what follows, we provide a theoretical intuition of  
 144 why an aligned signal-noise angle inhibits information coding, and directly test out this theory in fMRI data.

### Interpreting $\Delta$ NC through a neural coding framework

145 There is a rich history in neuroscience of investigating correlated neural activity through the lens of information coding (Johnson,  
 146 1980; Abbott and Dayan, 1999; Averbeck et al., 2006; Cohen and Kohn, 2011; Kohn et al., 2016; Moreno-Bote et al., 2014;  
 147 Panzeri et al., 2022; da Silveira and Berry, 2014). Recent theoretical work suggested that the impact of the NC on information  
 148 coding critically depends on the signs of the SC and NC (Moreno-Bote et al., 2014; da Silveira and Berry, 2014). This intuition  
 149 can be geometrically described in terms of the signal-noise angle (Panzeri et al., 2022). The signal axis describes the direction  
 150

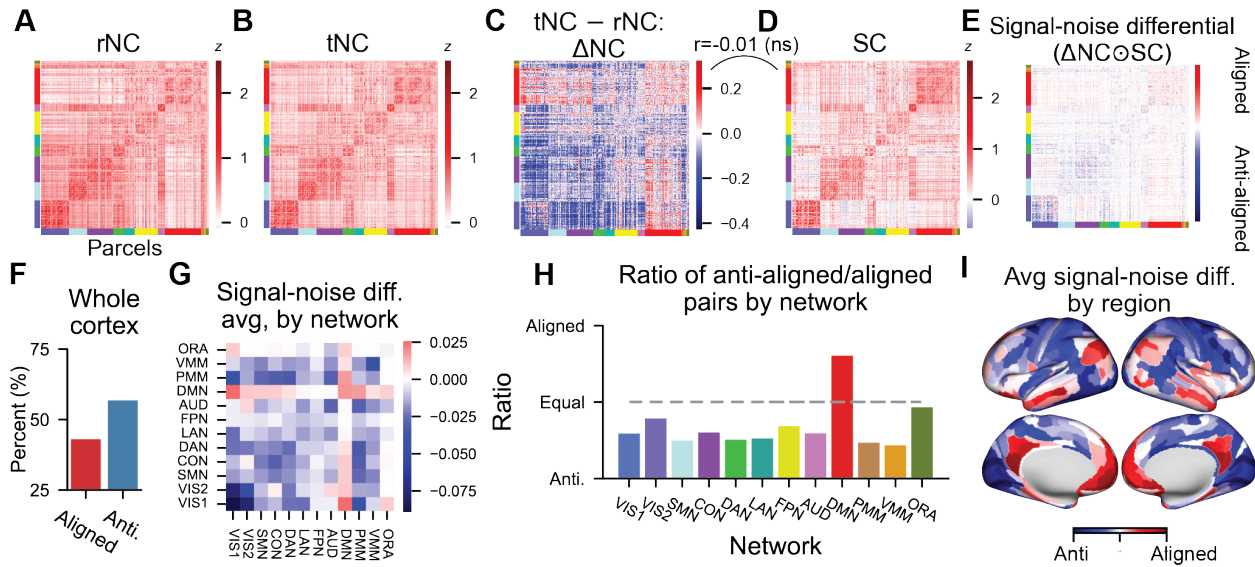

**Figure 4.** Disambiguating SC and state-dependent  $\Delta$ NCs in functional brain networks using the signal-noise differential matrix. a) The rNC and b) task NC matrix. c) The task vs rest NC matrix exhibits widespread correlation reductions. d) SC matrix, which reflects the task encoding similarity between pairs of regions. e) The signal-noise differential matrix can be obtained by computing the Hadamard product (element-wise multiplication) of the SC and the  $\Delta$ NC matrix. The signal-noise differential matrix therefore reflects whether the  $\Delta$ NC between a pair of regions reflects a change that is aligned (positive) or anti-aligned (negative) with its underlying SC. f) Percentage of aligned and anti-aligned signal-noise angle pairs across all cortical pairs. g) The signal-noise differential matrix averaged by network. h) Percent of aligned vs. anti-aligned NCs by each functional network. DMN is the only network that contains more aligned than anti-aligned NC changes. i) The average of the signal-noise differential matrix for each region (i.e., averaging across columns for each row in panel e).

151 of maximal covariance of the mean activity across many tasks/stimuli between a pair of neural units (Fig. 5a). The noise axis  
 152 describes the direction of maximum noise covariance. That is, covariance across repeated instances (e.g., trials or blocks) of the  
 153 same task/stimuli (5b-d). Thus, the signal-noise angle describes the angle between these two directions, and reflects whether  
 154 the NC is information-enhancing (orthogonal to SC) or information-limiting (aligned to SC). However, this initially proposed  
 155 framework only considers the overall magnitude of the NC, neglecting the impact of spontaneous rNC, which can be used  
 156 as a baseline. However, prior work in human neuroimaging has shown that the spontaneous correlations estimated during  
 157 resting-state fMRI are stable and informative (non-zero), reflecting an intrinsic network organization (Gratton et al., 2018).  
 158 Thus, investigating the impact of NCs on information coding relative to baseline would shed light on how the brain dynamically  
 159 reconfigures to support information-enhanced or information-limiting coding between pairs of brain regions.

160 To assess the reconfiguration of NCs from a baseline state (i.e., rNC) to a task state (i.e., tNC), we made several modifications  
 161 to prior theories. First, we measured the rNC to establish a baseline (Fig. 5e). Next, we measured the tNC, and computed  
 162 the  $\Delta$ NC (tNC - rNC) (Fig. 5f,g). If the  $\Delta$ NC was of the same sign as the underlying SC (i.e., an aligned  $\Delta$ NC; Fig. 5g),  
 163 this would suggest that the brain dynamically reconfigured such the tNC would interfere the coding axis. In contrast, if the  
 164  $\Delta$ NC was the opposite sign as the the underlying SC (i.e., an anti-aligned  $\Delta$ NC; Fig. 5f), then we would infer that the brain  
 165 dynamically reconfigures the NC such that the tNC minimizes interference along the SC axis (relative to baseline). Therefore,  
 166 the product of the SC and  $\Delta$ NC - which we define as the signal-noise differential - serves as a useful estimate to capture how  
 167  $\Delta$ NC impacts information coding.

168 Though prior work in human neuroimaging has reported more prevalent negative correlations in the rNC matrix, these  
 169 negative correlations are introduced through a preprocessing technique known as global signal regression (Murphy et al., 2009).  
 170 Global signal regression artifactually reduces the mean (across the entire brain) NC to 0, making it difficult to directly compare  
 171 the impact of magnitude differences across rest and task states. However, here we derive rNC and tNC from the same imaging  
 172 sessions (where rest is interleaved with task), therefore ensuring that differences in NC values cannot be due to different  
 173 baselines across different imaging runs. This ensures that the comparison of tNC and rNC magnitudes are interpretable. We  
 174 next test the hypothesis that the relationship between SCs and  $\Delta$ NCs impact task information coding in empirical fMRI brain  
 175 networks.

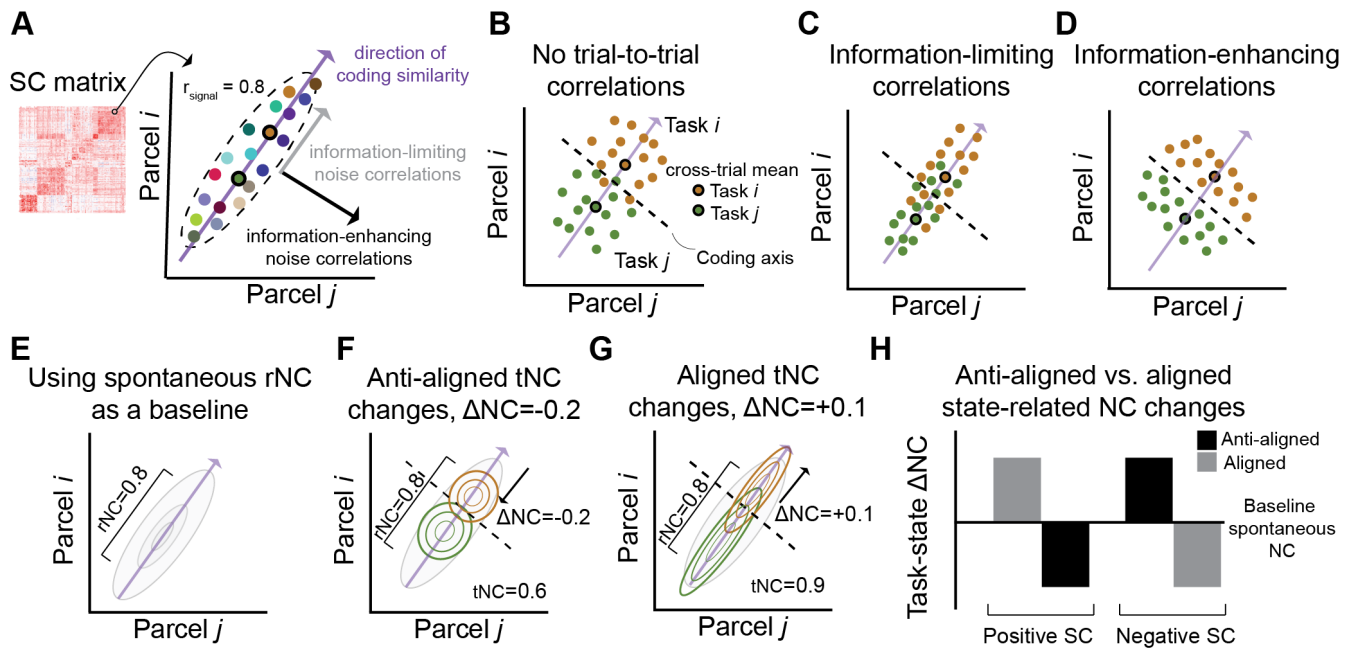

**Figure 5.** Interpreting  $\Delta$ NC from an information coding framework. a) For a pair of brain regions, the SC captures the direction of maximal covariance of the mean activity across many tasks. tNCs, on the other hand, capture within-task covariability (across events). b) An example of weak (or no) tNC for two tasks. c) Prior theories in the neural coding effects of tNC posit that correlations in the same direction as the underlying SC are information limiting. This is because the activity becomes more difficult for a linear decoder to distinguish between the two task conditions. d) In contrast, tNCs that are in the orthogonal direction as the underlying SC are information enhancing, since the trial-to-trial activity becomes more easily decodable by a linear classifier. e-g) We modify prior theories to assess how the task-state reconfiguration of tNC impacts information coding relative to the e) baseline rNC estimate. This modification involves estimating the  $\Delta$ NC (tNC – rNC). f) An anti-aligned  $\Delta$ NC, whereby the  $\Delta$ NC is the opposite sign of the SC, thereby reducing noise interference along the SC axis. g) An aligned  $\Delta$ NC, whereby the  $\Delta$ NC is the same sign of the SC, thereby increasing noise interference along the SC axis. h)  $\Delta$ NCs are putatively information-limiting or information-enhancing based on how the  $\Delta$ NCs are aligned or anti-aligned with the underlying SC.

### 176 The signal-noise differential determines the impact of NCs on task information decoding

177 Theoretical work suggests that the signal-noise differential determines how easily task information can be decoded from a set of  
 178 neural units. To test this empirically, we began by identifying sets of brain regions with entirely aligned or anti-aligned signal-  
 179 noise differentials (i.e., Fig. 4e). We leveraged a technique from network science – clique identification – to identify groups  
 180 of brain regions with exclusively aligned or anti-aligned signal-noise differentials (Palla et al., 2005) (Fig. 6a). Identifying  
 181 cliques of either aligned or anti-aligned  $\Delta$ NCs ensured that all brain regions would either have putatively information-limiting  
 182 or information-enhancing correlations with each other.

183 We implemented this by thresholding the signal-noise differential matrix to include either exclusively aligned or anti-aligned  
 184 NCs, and then searching for cliques within these thresholded matrices (see Methods). To control for the possibility that  
 185 identifying cliques would identify brain regions from functionally different networks, we first performed an analysis that  
 186 identified aligned and anti-aligned  $\Delta$ NC 5-cliques (cliques with 5 brain regions) for every pair of networks. Identifying both  
 187 aligned and anti-aligned cliques matched to every network-to-network configuration (e.g., Visual to Somatomotor network),  
 188 guaranteed that differences in task decoding were not due to decoding cliques from different functional networks. (We also  
 189 show corresponding results for 8- and 10-cliques; Supplementary Fig. 3).

190 We directly compared the decoding performance of anti-aligned versus aligned cliques for every pair of networks (Fig. 6b).  
 191 We found that, while not all pair of networks had a statistically significant difference in decoding performance, 24% of network  
 192 pairs had a significantly higher decoding performance for anti-aligned versus aligned cliques (13/54 network-matched cliques;  
 193 two-sided Wilcoxon signed-rank test, Bonferroni-corrected  $p < 0.05$ ). (Note that not all network-network pairs contained  
 194 anti-aligned and aligned 5-cliques, and so those networks were excluded; see matrix elements colored in white, Fig 6b.)  
 195 Importantly, and as hypothesized, no aligned clique had a greater decoding accuracy than anti-aligned clique. To obtain a global  
 196 summary statistic, we computed the average decoding accuracy for all anti-aligned cliques (averaged across all networks) and



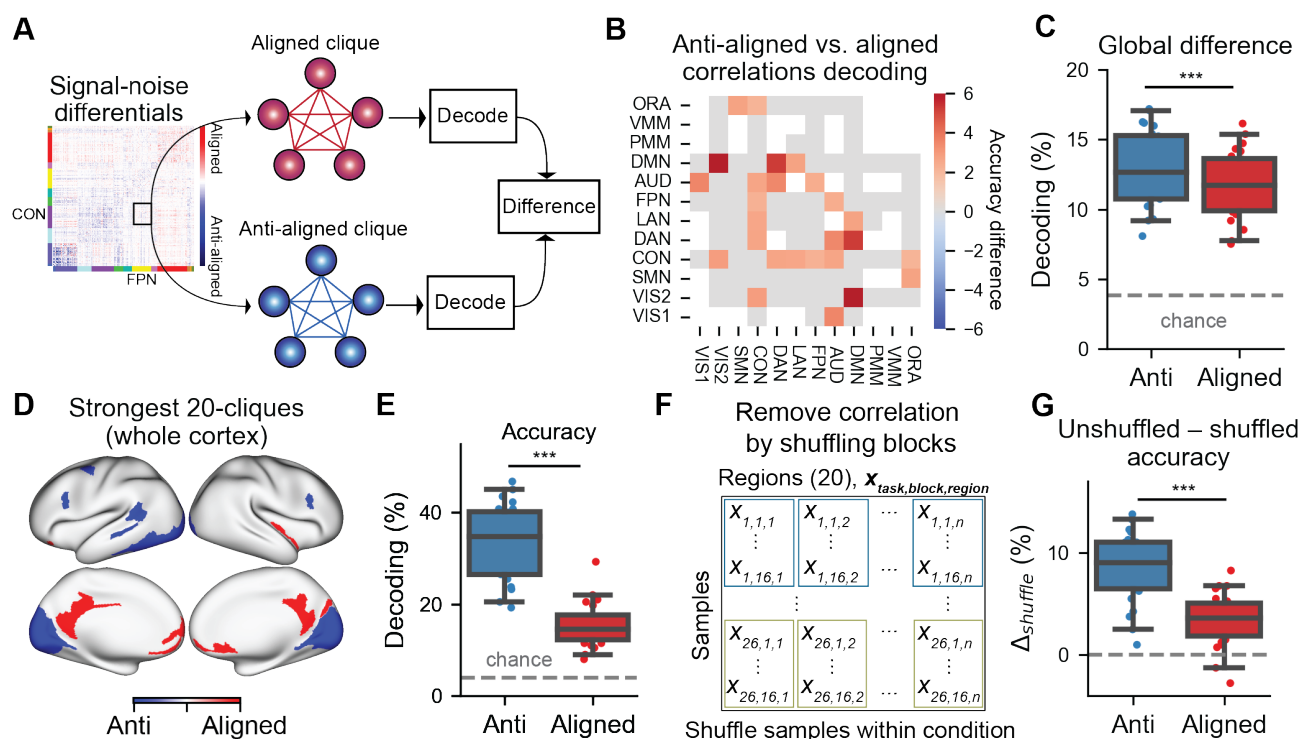

**Figure 6.** Brain regions with anti-aligned  $\Delta$ NCs have improved information decoding over aligned  $\Delta$ NCs. a) We identified network-matched sets of aligned or anti-aligned  $\Delta$ NCs by identifying cliques (sub-networks of entirely aligned or anti-aligned  $\Delta$ NCs). b) For each pair of networks, we found that sets of brain regions with anti-aligned  $\Delta$ NCs had significantly higher multi-task decoding performance than brain regions with aligned  $\Delta$ NCs for specific network pairs (FWE-corrected). Note that matrix elements colored in gray had no significant difference. Elements in white were not testable (due to non-existence of aligned and/or anti-aligned cliques). c) We computed the average difference for every matrix element in panel b) for anti-aligned versus aligned cliques, finding that on average, anti-aligned cliques had greater task decodability than aligned cliques. d) The strongest (highest and lowest) anti-aligned and aligned 20-cliques across the entire cortex. e) The decoding accuracy for the anti-aligned versus aligned  $\Delta$ NC cliques. f) We evaluated the impact of NCs by destroying correlated variability when training the linear decoder. This was achieved by randomly shuffling task block structure for each brain region separately. g) We computed the difference in decoding performance between unshuffled and shuffled conditions. Shuffling task blocks impacted the decoding performance for anti-aligned cliques significantly more than aligned cliques. This is consistent with the hypothesis that the correlation structure of anti-aligned cliques are important for improved task information decoding (since  $\Delta$ NCs are reconfigured in the opposite direction of SCs). (\*\*\*) indicates  $p < 0.0001$ ; \*\* indicates  $p < 0.001$ ; \* indicates  $p < 0.05$

197 aligned cliques (Fig. 6c). We found that anti-aligned cliques had a significantly higher decoding performance than aligned  
 198 cliques (accuracy difference=1.1%,  $p < 10e-06$ ). These findings verify that sets of anti-aligned  $\Delta$ NCs have improved decodability  
 199 relative to aligned  $\Delta$ NCs. Moreover, anti-aligned  $\Delta$ NCs were overwhelmingly NC reductions (96.4% of all anti-aligned  $\Delta$ NCs  
 200 were  $\Delta$ NC < 0). These results highlight three key insights: 1) The impact of tNC should be baselined to spontaneous rNC to  
 201 infer the impact of NCs on task information decoding; 2) The impact of state-related  $\Delta$ NCs on task information coding can only  
 202 be interpreted after knowing the underlying SC; 3) Contrary to prior hypotheses in the neuroimaging literature, NC reductions  
 203 tend to improve task information coding (rather than inhibit communication) (for review, see Gonzalez-Castillo and Bandettini  
 204 (2017)).

205 The above task decoding analysis constrained the comparison of anti-aligned and aligned  $\Delta$ NCs to a specific network  
 206 pair. However, it is possible that the signal-noise differentials provide useful information about *which* brain regions are  
 207 involved in optimizing for task information coding. We therefore lifted the constraint of comparing decoding performance  
 208 between regions within the same networks. Instead, we sought to identify which brain regions are most/least important for  
 209 task information decoding, by identifying cliques with the strongest anti-aligned/aligned  $\Delta$ NCs. We identified the 20-clique  
 210 with the greatest anti-aligned and aligned  $\Delta$ NCs, as determined by the magnitude of the signal-noise differential. We found

211 that regions with aligned  $\Delta$ NCs were primarily located in medial prefrontal and posterior cingulate areas (Fig. 6d). See also  
212 Supplementary Fig. 3i,j for a map containing all possible aligned and anti-aligned 20-cliques.) This was consistent with earlier  
213 results, which found that the DMN had disproportionate number of regions with aligned  $\Delta$ NCs (Fig. 4h). Importantly, when  
214 we computed the decoding performance of the aligned 20-clique, it exhibited a significantly lower decoding accuracy than  
215 the anti-aligned 20-clique (accuracy difference=18.24%,  $p < 10e-06$ ; Fig. 6e). (We replicated this finding using whole-cortex  
216 15-cliques and 25-cliques; Supplementary Fig. 3.) This again provides additional evidence that regions with aligned  $\Delta$ NCs  
217 limit task information decoding, while anti-aligned  $\Delta$ NCs enhance task information coding. Neuroscientifically, these findings  
218 also suggest that NCs with the DMN (which are primarily NC increases) inhibit the fidelity of task information coding.

### 219 **Destroying task-state correlations impacts the decodability of task information**

220 Supported by theory, our empirical results demonstrate that the alignment of  $\Delta$ NCs with their underlying SCs impacts task  
221 information decoding. However, signal-noise differentials are determined by the relationship of how NCs emerge given the  
222 underlying SC. While SC patterns are an intrinsic property of a system (and likely reflect underlying anatomical connectivity;  
223 [Passingham et al. \(2002\)](#)), NC is reflected in ongoing, block-to-block (or trial-to-trial) activity. Thus we sought to assess if  
224 destroying the NCs between brain regions (by shuffling block structure) would impact task decoding.

225 To destroy the correlated activity between brain regions, we shuffled the block ordering for each brain region separately  
226 (Fig. 6f; see Methods). This removed the effect of tNCs when training a decoder. (Note that in the context of a decoding  
227 analysis, shuffling happened on the training set within every cross-validation fold to ensure no leakage between train and test  
228 sets; see Methods). We computed the decoder accuracy after removing the NCs for both anti-aligned and aligned cliques.  
229 When comparing the difference between unshuffled and shuffled decoder performance ( $\Delta_{shuffled}$ ), we found that destroying  
230 NC structure of anti-aligned cliques significantly reduced its decoding performance (unshuffled accuracy=33.6%; shuffled  
231 accuracy=25.3%;  $p < 1e-6$ ; Fig. 6g). While shuffling the tNC for aligned cliques also reduced its decoding performance  
232 (unshuffled accuracy=15.4%; shuffled accuracy=11.9%;  $p < 1e-5$ ; Fig. 6g), removing the effect of NCs had a significantly  
233 greater impact on the anti-aligned  $\Delta$ NCs ( $\Delta_{shuffled}$  anti-aligned=8.4%;  $\Delta_{shuffled}$  aligned=3.4%;  $p < 1e-5$ ; Fig. 6g). These  
234 empirical findings are consistent with the hypothesis that tNC of anti-aligned cliques significantly enhance information coding  
235 relative to aligned cliques, and demonstrate the information-coding relevance of tNC changes.

## 236 **Discussion**

237 We leveraged insights from neural coding to interpret large-scale task-state correlation changes in human fMRI data. We first  
238 characterized the SCs and NCs of human fMRI data using a multi-task dataset with 26 cognitive tasks, finding that SCs had  
239 greater network modularity and segregation than the commonly-used rNC matrix. This suggested that SC may have greater  
240 utility than rNC in identifying functional specialization across cortical regions. Next, we sought to understand how NCs emerge  
241 from underlying network dynamics. We constructed a linear statistical model to gain an intuition of how state-dependent  
242 NCs interact with each other. This model revealed that – under the assumption of linear dynamics – tNC should emerge as  
243 the algebraic sum of spontaneous background activity and stimulus-specific activity. This implied that stimulus-specific NCs  
244 should always align with the underlying SC. In contrast to this model, we did not find this pattern in empirical NCs. Instead, a  
245 majority of  $\Delta$ NCs were anti-aligned with the underlying SCs. This led us to interpret these anti-aligned  $\Delta$ NCs through a neural  
246 coding perspective, which predicts that anti-aligned  $\Delta$ NCs should improve task information coding. This is because the NCs  
247 are reconfigured to avoid interference along the SC axis. Indeed, when testing this prediction in empirical data, we found that  
248 anti-aligned  $\Delta$ NCs had significantly higher task decoding accuracies than  $\Delta$ NCs that were aligned with their underlying SCs.  
249 Together, these findings provide a task information coding perspective to interpret task-state correlation changes in human  
250 functional brain networks.

251 In the human neuroimaging literature, studies of inter-region communication are viewed through the lens of “functional  
252 connectivity”. While FC is a broad umbrella term that incorporates a variety of techniques ([Reid et al., 2019](#); [Cliff et al., 2022](#); [Frässle et al., 2018](#); [Friston, 2011](#); [Sanchez-Romero and Cole, 2021](#)), the most commonly-used measure is the Pearson  
253 correlation – the same metric used in computing spike count NCs. Yet despite the use of identical statistical metrics across  
254 the human neuroimaging and neurophysiology, the frameworks for interpreting correlations diverge. On one hand, human  
255 neuroimaging studies often analogize the strength of correlation with the strength of “communication” (for review of the  
256 literature, see [Gonzalez-Castillo and Bandettini \(2017\)](#)). On the other hand, NCs are typically viewed through the lens of how  
257 they impact task information coding ([Abbott and Dayan, 1999](#); [Panzeri et al., 2022](#); [Cohen and Kohn, 2011](#)). Empirically, we  
258 found that the majority of NCs that enhance information coding – anti-aligned  $\Delta$ NCs – tend to be tNC decreases (96.4% of  
259 anti-aligned  $\Delta$ NCs are decreases). This finding places these two views at odds, since prior interpretations of tNC reductions  
260 have been interpreted as “reduced” or segregated communication among brain regions ([Wig, 2017](#); [Rubinov and Sporns, 2010](#)).  
261 Here we suggest that the neural coding perspective provides a parsimonious explanation for why reduced tNCs are widespread  
262 and enhance task coding: The anti-alignment of the  $\Delta$ NC with the SC minimizes the amount of signal interference between the  
263

two brain regions. Given that the majority of brain regions have a positive SC (Fig. 2b), it follows that the majority of  $\Delta$ NCs should be reductions to enhance task information coding among brain regions.

Most studies in the fMRI literature typically estimate tNC using adjacent time points during task performance blocks (Cole et al., 2014; Krienen et al., 2014), rather than the across-trial correlations employed here (Rissman et al., 2004). However, computing the correlation across adjacent timepoints within a task block can make it difficult to disambiguate signal and noise sources, if proper removal of the mean task effect is not performed (Cole et al., 2019). The present approach disambiguates SC and NC measurements by isolating the cross-block mean and cross-block variance by obtaining block-to-block activation estimates separately. Importantly, this is the common approach to calculating SCs and NCs in the neurophysiology literature (Cohen and Kohn, 2011). Nevertheless, to demonstrate the generality of the statistical inferences made here, we found a high correspondence between the  $\Delta$ NC matrices when computing tNC across timepoints during task blocks (Supplementary Fig. 1). (This is the commonly-used approach to estimating tNC in fMRI neuroimaging.) Together, these findings suggest that differences in tNC calculation should not influence the present conclusions.

Our findings are also widely consistent with prior studies across subfields in neuroscience that find widespread decorrelations during task states. These studies revealed that during task and attentional states, correlations are reduced among pairs of neurons (Cohen and Maunsell, 2009), cortical regions accessed with wide-field calcium imaging data (Pinto et al., 2019), mean-field multi-unit recording across cortical regions in non-human primates (Ito et al., 2020), and human fMRI correlations (Ito et al., 2020). While prior literature has demonstrated that spike count correlations impact information coding in non-human primates (Cohen and Maunsell, 2009; Ni et al., 2022), it was an open question as to whether these intuitions would scale to larger spatial organizations and broader cognitive tuning curves. Our findings affirm that the generic statistical principles developed to understand neural coding in spiking units are translatable to different data modalities, and naturally scale up to broader spatial and cognitive levels of organization. However, the current study only takes into account task-general changes to NCs, rather than task-specific NC changes. While prior work in non-human primate spike recordings suggest that NCs change to support task coding *in general* (rather than optimally for each task) (Ni et al., 2022), it will be important for future studies to investigate the contribution of task-general NC changes versus task-specific NCs to support task information coding.

The present findings, as well as current limitations, open new questions that future studies can explore. First, while the finding that anti-aligned correlations improve the task decodability of those brain regions and networks, it is unclear how this optimized information is implemented and used by the brain. Which downstream brain regions read-out this information? What are the biophysical mechanisms that produce anti-aligned  $\Delta$ NCs? Future work can build on this work to investigate how optimized task information is used and implemented by the brain (De-Wit et al., 2016). Second, the intuitions behind how the signal-noise differential impacts task coding were developed for two dimensions (i.e., two regions or neurons) (Fig. 5) (Moreno-Bote et al., 2014; da Silveira and Berry, 2014). While we demonstrate that these intuitions generally apply for more than just two regions (e.g., improved decoding for anti-aligned  $n$ -cliques), it is not explicitly clear how these intuitions generalize to greater dimensions. Thus, it will be important for future work to develop theory and measures (beyond just the signal-noise differential/angle) beyond two dimensions. Finally, interpreting the impact of NCs on task coding requires knowledge of the underlying SC. However, in many cases and existing datasets, identifying the SC is infeasible, since it requires many tasks and conditions. It will be interesting for future work to develop techniques to approximate the SC without acquisition of task data, such as anatomical connectivity fingerprinting, which has been thought to define the functional tuning of local brain regions (Passingham et al., 2002).

In conclusion, we disambiguate SC and NC in large-scale human functional brain networks using a multi-task fMRI dataset, and characterize the impact of NCs on task information coding. This work bridges the disparate fields of the spike count correlation analyses (typically carried out in non-human animals) with the emerging field of task-state functional connectomics in humans. Importantly, our findings place functional connectomics within a broader framework of neural coding, demonstrating the impact of task-state FC for task coding. We hope these findings spur future investigations into understanding the properties of task information coding in large-scale human brain networks.

## Methods

### Multi-domain task battery dataset

Portions of this section are paraphrased from the dataset's original publication's Methods section (King et al., 2019), and a prior study we used to investigate multi-task cortical representations (Ito and Murray, 2021).

We used the publicly available multi-domain task battery (MDTB) dataset, which was originally published to study the functional (task) boundaries of the human cerebellum (King et al., 2019). The dataset contains both resting-state and task-state fMRI data for 24 subjects collected at Western University (16 women, 8 men; mean age = 23.8 years, s.d. = 2.6; all right-handed; see King et al. (2019) for exclusion criteria). All participants gave informed consent under an experimental protocol approved by the institutional review board at Western University.

317 The MDTB dataset collected data during 26 cognitive tasks, and up to 45 different task conditions for each participant.  
318 Tasks were grouped together in two sets (set A and B; Fig. 1e). Each participant first performed all tasks in set A, and returned  
319 for a second session to perform tasks in set B. Each task set consisted of two imaging runs. Half of the subjects had sessions  
320 separated by 2-3 weeks, while the other half had sessions separated by roughly a year. A separate resting-state scan with two  
321 10 minute runs each was collected for 18/24 subjects. (This resting-state scan was independent of the 'rest' block in the task  
322 imaging sessions.)

323 The MDTB dataset was designed to target diverse cognitive processes. Set A and B contained eight overlapping tasks  
324 (e.g., theory of mind and motor sequence tasks), and nine tasks unique to each set (Fig. 1a). Both sets contained 17 tasks each.  
325 Further details about the experimental tasks and conditions have been previously reported in the original dataset publication  
326 (see Supplementary Table 1 of King et al. (2019); [https://static-content.springer.com/esm/art%3A10.1038%2Fs41593-019-0436-x/MediaObjects/41593\\_2019\\_436\\_MOESM1\\_ESM.pdf](https://static-content.springer.com/esm/art%3A10.1038%2Fs41593-019-0436-x/MediaObjects/41593_2019_436_MOESM1_ESM.pdf)).

328 Tasks were performed once per imaging session. Tasks were presented in an interleaved block design. Task blocks began  
329 with a 5s instruction screen, followed by 30s of continuous task performance. 11 out of 26 tasks were passive and required no  
330 motor response (e.g., movie watching). Tasks that required motor responses were made with either left, right, or both hands  
331 using a four-button box using either index or middle fingers. All tasks (within each set) were performed within a single imaging  
332 run, ensuring a common baseline between tasks for all participants.

### 333 **fMRI preprocessing**

334 Portions of this section are paraphrased from a prior study using a similar preprocessing strategy (Ito and Murray, 2021).

335 fMRI data were minimally preprocessed using the Human Connectome Project (HCP) preprocessing pipeline. The HCP  
336 pipelines were implemented within the Quantitative Neuroimaging Environment & Toolbox (QuNex, version 0.61.17; Ji et al.  
337 (2022)). The HCP preprocessing pipeline consisted of anatomical reconstruction and segmentation, EPI reconstruction and  
338 segmentation, spatial normalization to the MNI152 template, and motion correction. Further nuisance regression was performed  
339 on the minimally preprocessed time series. This included the removal of six motion parameters, their derivatives, and the  
340 quadratics of those parameters (24 motion regressors in total). We also removed the mean physiological time series extracted  
341 from the white matter and ventricle voxels, their derivatives, and the quadratics of those time series (8 physiological nuisance  
342 signals). In total, there were 32 nuisance regressors. For task fMRI data, nuisance regressors were included simultaneously  
343 with task regressors to extract the task activation estimates described below.

### 344 **fMRI task activation estimation**

345 Portions of this section are paraphrased from a prior study using a similar preprocessing strategy (Ito and Murray, 2021).

346 We performed a single-subject beta series regression (Rissman et al., 2004) on fMRI task data to estimate parcel-wise  
347 activations using the Glasser atlas (Glasser et al., 2016). Each task block (30s) was modeled with a separate task regressor. The  
348 instruction period prior to the task block was not included. Thus, the number of task regressors was equivalent to the total  
349 number of task blocks per imaging session. Each task regressor was modeled as a boxcar function from the block onset to  
350 offset (0s indicate off, 1s indicate on), and then convolved with the SPM canonical hemodynamic response function to account  
351 for hemodynamic lags (Friston et al., 1994). We used the coefficients of each regressor as the activation for each task block.  
352 Task GLMs were implemented in python using the LinearRegression function within scikit-learn (version 0.23.2) in Python  
353 (version 3.8.5).

### 354 **SC and NC estimation**

355 The SC between two brain regions was computed through the following steps. The mean activation of each task was computed  
356 by averaging the block-wise GLM coefficients for that task. This resulted in 26 task activations for every brain region. The SC  
357 was then computed as the across-task correlation. Note that since 8 of the 26 tasks were performed in both task sets (i.e., set A  
358 and set B), we only included data from one of the task sets. This helped to control the data imbalance across different tasks,  
359 ensuring that every task had an equal number of blocks when calculating the mean task activation (16 blocks).

360 The NC for two brain regions was estimated for each task separately. NC estimation that we performed is identical to  
361 task-state FC calculation using a beta series regression (Rissman et al., 2004).

362 To estimate tNC using task blocks, block by block activation coefficients were obtained for each task separately. Each task  
363 had 16 blocks across all imaging sessions. The NC for a pair of regions was the across-block correlation *within* a task. Since  
364 there were 26 tasks, there were 26 NCs for every pair of brain regions. We averaged the NC across all tasks (excluding the  
365 rNC) to obtain a task-general tNC matrix. rNC was computed using the resting-state blocks during the task imaging session.  
366 To verify that the beta series regression approach to calculating NC is similar to other NC calculation approaches (i.e., using  
367 timepoints within a task block), we also compared NC estimates using correlations across timepoints (Supplementary Fig.  
368 1). Importantly, rNCs, tNCs, and  $\Delta$ NCs were highly similar to each other despite differences in how they were estimated

369 (block-to-block activity versus timepoint to timepoint activity). This indicated that task coding properties of NCs evaluated  
370 here generalize to both block-to-block and timepoint-to-timepoint NC estimates.

371 Note that timepoint-to-timepoint NC estimation performed in Supplementary Fig. 1 is consistent with prior approaches to  
372 calculating NC (Cole et al., 2019; Ito et al., 2020). Specifically, for each task, we fit a finite impulse response model (across  
373 blocks of the same task) to remove the mean-evoked response (which includes the hemodynamic response). This approach  
374 flexibly removes the mean-evoked response, while taking into account each brain region's idiosyncratic hemodynamic response  
375 shape. NCs were then calculated on the residual time series. This approach ensured that NCs were not conflated by the mean  
376 (i.e., signal) response.

### 377 **Network analysis**

378 We performed both network-style (Rubinov and Sporns, 2011) and gradient-style (Huntenburg et al., 2018) analysis on SC and  
379 NC matrices. Network-style analysis included computing the network modularity and network segregation of SC and rNC  
380 matrices with respect to a previously-published functional network partition (Ji et al., 2019).

We used an undirected signed modularity metric that calculates modularity with respect to a provided network partition  
(Rubinov and Sporns, 2011). We use the asymmetric variant that treats positive and negative values differently (i.e., positive  
values link nodes within a module, and negative values dissociate nodes between modules). Modularity was calculated as

$$Q^* = Q^+ + \frac{v^-}{v^+ + v^-} Q^-$$

where  $Q^\pm$  is defined as

$$Q^\pm = \frac{1}{v^\pm} \sum_{ij} (w_{ij}^\pm - e_{ij}^\pm) \delta_{M_i M_j}$$

381  $w_{ij}^\pm$  is the connection weight (positive or negative values only),  $v^\pm = \sum w_{ij}^\pm$ ,  $e_{ij}^\pm$  is the chance-expected within module connections  
382 defined as  $e_{ij}^\pm = \frac{s_i^\pm s_j^\pm}{v^\pm}$ , where  $s_i^\pm = \sum w_{ij}^\pm$ ,  $\delta_{M_i M_j} = 1$  when  $i$  and  $j$  are in the same network module and  $\delta_{M_i M_j} = 0$  otherwise.  
383 Code was implemented using the brain connectivity toolbox (bctpy version 0.5.0).

Network segregation was measured as the difference between within-module and between-module weights, divided by  
within-module weights (Chan et al., 2014). Segregation was first calculated for each region separately, and then averaged across  
all regions. Segregation of a region  $i$  was computed as

$$s_i = \frac{x_{in} - x_{out}}{x_{in}}$$

384 where  $x_{in}$  is the within-module weights for region  $i$ , and  $x_{out}$  is the between-module weights.

385 Gradient-style analysis was computed by performing a Principal Components Analysis (PCA) on either the SC or NC  
386 matrices. SC and NC matrices were thresholded to retain only 20% of the strongest correlations prior to calculating gradients.  
387 PCA was implemented using scikit learn's PCA function (sklearn.decomposition.PCA, version 1.0.2).

### 388 **Linear statistical network model**

We used a statistical model to predict how task-related variability influences baseline spontaneous activity. We partitioned 300  
nodes into 10 networks (30 nodes each). Networks were fully connected with a weight of 1. Since resting-state NC typically  
exhibits positive correlations among all pairs of regions, we introduced a globally shared signal. Specifically, a region's activity  
 $x_i$  was determined as the linear sum of four Gaussian distributions (10,000 samples),  $X \sim N(0, 1)$ :

$$x_i = x_{shared} + x_{private} + s_{drive} * 0.75 + g * 0.75$$

389 where  $x_{shared}$  is a shared time series amongst nodes within a network,  $x_{private}$  is a unique time series for  $x_i$ ,  $s_{drive}$  is the  
390 stimulus-related variance (set to 0 in the baseline spontaneous case), and  $g$  is the global variance shared by all nodes.

### 391 **Task decoding analyses**

#### 392 **Clique identification**

393 We identified cliques of aligned and anti-aligned signal-noise differentials. This was to test the impact of signal-noise  
394 differentials on task information decoding. Cliques are a sub-network of a graph that are fully connected (Sizemore et al., 2018).  
395 This means that every node is connected to every other node in that sub-network. Using the signal-noise differential matrix (Fig.  
396 6a), we identified aligned and anti-aligned cliques by creating thresholded matrices of exclusively aligned and anti-aligned  
397 region pairs, respectively. This ensured that when performing decoding analyses on a set of regions, that every pair of region

398 was either aligned or anti-aligned. This was important given that, from a neural coding perspective, aligned signal-noise  
399 differentials would be information-limiting relative to baseline correlations, while anti-aligned signal-noise differentials would  
400 be information-enhancing (Fig. 5).

401 We identified aligned and anti-aligned 5-cliques for every pair of functional network configuration (e.g., region sets between  
402 the Default Mode with the Frontoparietal network; Visual 1 network to the Somatomotor network). Matching aligned and  
403 anti-aligned 5-cliques to the specific network configuration controlled for the possibility of inherent differences in decoding  
404 performance when identifying cliques from different networks. (For example, there might be intrinsic differences when  
405 comparing the decoding performance of an aligned clique in the Default Mode network versus the Visual 1 network.) However,  
406 aligned and anti-aligned 5-cliques did not exist for all network pairs. These network pairs were therefore excluded from  
407 analysis, since aligned and anti-aligned decoding performances could not be directly compared. In supplementary analyses, we  
408 also show that our findings generalize to 8-cliques and 10-cliques (Supplementary Fig. 3).

409 In addition, we identified the 20-clique with the strongest aligned and anti-aligned 20-clique (Fig. 6d). Strongest was defined  
410 as having the greatest negative or positive average values within an aligned or anti-aligned 20-clique (using the signal-noise  
411 differential matrix; Fig. 6a). Note that while the aligned and anti-aligned 20-cliques were in spatially disjoint regions, decoding  
412 performance was appropriately controlled for by removing the effect of correlated variability (e.g., [Leavitt et al. \(2017\)](#); Fig.  
413 6f,g), as discussed in the next subsection.

414 Clique identification was carried out using the python package NetworkX (networkx.find\_clique function; version 2.5).  
415 To make identifying cliques more tractable, the signal-noise differential matrix was thresholded to retain only the top 20%  
416 positive or negative values. Note that we also replicated these findings using 15- and 25- cliques (Supplementary Fig. 3). For  
417 the 25-clique analysis, we thresholded the signal-noise differential matrix to the top 40% of positive or negative values.

### 418 **Decoding analyses**

419 To assess the role of NCs on task information coding, we performed a multi-task (26-way) linear decoding analyses. Decoding  
420 analyses were performed within subjects, using the block-wise activations of every task. There were 26 tasks with 16 blocks  
421 per task (416 samples per subject). We performed a leave-one-out cross-validation, cross-validating across blocks. Samples  
422 in the training set were bootstrapped (20 samples per task type, with replacement). Prior to fitting the linear decoder on  
423 the training sets, samples in the training set were feature-normalized (z-normalized), and samples in the test set were also  
424 feature-normalized using the mean and standard deviation estimated from the training set (to avoid train-test leakage). A linear  
425 decoder was fit using logistic regression, and was implemented using scikit learn (version 1.0.2).

426 To evaluate the effect of correlated variability on aligned and anti-aligned cliques, we performed a follow-up analysis that  
427 removed the impact of NCs on linear decoding. This was implemented by shuffling the ordering of task blocks for each brain  
428 region and each task type separately (see Fig. 6f). This was done on the training set within each cross-validation fold. Shuffling  
429 blocks for each brain region separately removed the contribution of NCs on training a linear decoder.

430 Note that while prior studies suggest that the best practices for decoding analyses employ a 5- or 10-fold cross-validation  
431 ([Varoquaux, 2018](#)), we used a leave-one-out cross-validation approach to maximally assess the impact of correlated activity  
432 (within the training set) on decoding performance. (Note exactly one sample from each task was left out from the training set,  
433 such that the test set had 26 samples in total.) Moreover, we were not focused on making inferences on decoding performance  
434 relative to chance. Instead, we were interested in assessing how correlated activity (within the training set) impacted decoding  
435 performance for aligned and anti-aligned cliques, and how shuffling correlated activity would (within the training set) would  
436 impact overall decoding performance. If NCs had no impact on decoding performance, shuffling the block structure in the  
437 training set would have no impact on task decoding.

### 438 **Data visualization**

439 All graphical plots were visualized using seaborn (version 0.11.2; [Waskom \(2021\)](#)). All cortical surface plots were visualized  
440 using surfplot (version 0.1.0; [Gale et al. \(2021\)](#); [Vos de Wael et al. \(2020\)](#)).

### 441 **Code and data availability**

442 All data in this study has been made publicly available on OpenNeuro by King and colleagues ([King et al., 2019](#)). <https://openneuro.org/datasets/ds002105>

443 All code related to this study will be made publicly available on GitHub. Analyses and models were implemented using  
444 Python (version 3.8.5).

### 446 **References**

447 Abbott, L. F. and P. Dayan (1999, January). The Effect of Correlated Variability on the Accuracy of a Population Code. *Neural*  
448 *Computation* 11(1), 91–101.

- 449 Averbeck, B. B., P. E. Latham, and A. Pouget (2006, May). Neural correlations, population coding and computation. *Nature*  
450 *Reviews Neuroscience* 7, 358.
- 451 Burt, J. B., M. Demirtaş, W. J. Eckner, N. M. Navejar, J. L. Ji, W. J. Martin, A. Bernacchia, A. Anticevic, and J. D. Murray  
452 (2018, September). Hierarchy of transcriptomic specialization across human cortex captured by structural neuroimaging  
453 topography. *Nature Neuroscience* 21(9), 1251–1259.
- 454 Chan, M. Y., D. C. Park, N. K. Savalia, S. E. Petersen, and G. S. Wig (2014, November). Decreased segregation of brain systems  
455 across the healthy adult lifespan. *Proceedings of the National Academy of Sciences* 111(46), E4997–E5006. Publisher:  
456 National Academy of Sciences Section: PNAS Plus.
- 457 Cliff, O. M., J. T. Lizier, N. Tsuchiya, and B. D. Fulcher (2022, January). Unifying Pairwise Interactions in Complex Dynamics.  
458 arXiv:2201.11941 [physics].
- 459 Cohen, M. R. and A. Kohn (2011). Measuring and interpreting neuronal correlations. *Nature Neuroscience* 14(7), 811–819.
- 460 Cohen, M. R. and J. H. R. Maunsell (2009, November). Attention improves performance primarily by reducing interneuronal  
461 correlations. *Nature Neuroscience* 12, 1594.
- 462 Cole, M. W., D. S. Bassett, J. D. Power, T. S. Braver, and S. E. Petersen (2014). Intrinsic and task-evoked network architectures  
463 of the human brain. *Neuron* 83(1), 238–251.
- 464 Cole, M. W., T. Ito, D. Schultz, R. Mill, R. Chen, and C. Cocuzza (2019, April). Task activations produce spurious but  
465 systematic inflation of task functional connectivity estimates. *NeuroImage* 189, 1–18.
- 466 Cole, M. W., G. J. Yang, J. D. Murray, G. Repovš, and A. Anticevic (2016). Functional connectivity change as shared signal  
467 dynamics. *Journal of Neuroscience Methods* 259, 22–39.
- 468 da Silveira, R. A. and M. J. Berry (2014, November). High-Fidelity Coding with Correlated Neurons. *PLoS Computational*  
469 *Biology* 10(11), e1003970.
- 470 De-Wit, L., D. Alexander, V. Ekroll, and J. Wagemans (2016). Is neuroimaging measuring information in the brain?  
471 *Psychonomic Bulletin & Review*, 1–14.
- 472 Dosenbach, N. U. F., D. a. Fair, F. M. Miezin, A. L. Cohen, K. K. Wenger, R. a. T. Dosenbach, M. D. Fox, A. Z. Snyder, J. L.  
473 Vincent, M. E. Raichle, B. L. Schlaggar, and S. E. Petersen (2007). Distinct brain networks for adaptive and stable task  
474 control in humans. *Proceedings of the National Academy of Sciences of the United States of America* 104(26), 11073–11078.
- 475 Duff, E. P., T. Makin, M. Cottaar, S. M. Smith, and M. W. Woolrich (2018). Disambiguating brain functional connectivity.  
476 *NeuroImage* 173, 540–550.
- 477 Friston, K. J. (2011, January). Functional and Effective Connectivity: A Review. *Brain Connectivity* 1(1), 13–36. Publisher:  
478 Mary Ann Liebert, Inc., publishers.
- 479 Friston, K. J., A. P. Holmes, K. J. Worsley, J.-P. Poline, C. D. Frith, and R. S. J. Frackowiak (1994). Statistical parametric maps  
480 in functional imaging: A general linear approach. *Human Brain Mapping* 2(4), 189–210.
- 481 Frässle, S., E. I. Lomakina, L. Kasper, Z. M. Manjaly, A. Leff, K. P. Pruessmann, J. M. Buhmann, and K. E. Stephan (2018,  
482 October). A generative model of whole-brain effective connectivity. *NeuroImage* 179, 505–529.
- 483 Gale, D. J., R. Vos de Wael., O. Benkarim, and B. Bernhardt (2021, October). Surfplot: Publication-ready brain surface figures.
- 484 Glasser, M. F., T. S. Coalson, E. C. Robinson, C. D. Hacker, J. Harwell, E. Yacoub, K. Ugurbil, J. Andersson, C. F. Beckmann,  
485 M. Jenkinson, S. M. Smith, and D. C. Van Essen (2016). A multi-modal parcellation of human cerebral cortex. *Nature*, 1–11.
- 486 Glasser, M. F. and D. C. Van Essen (2011). Mapping human cortical areas in vivo based on myelin content as revealed by  
487 T1-and T2-weighted MRI. *Journal of Neuroscience* 31(32), 11597–11616.
- 488 Gonzalez-Castillo, J. and P. A. Bandettini (2017). Task-based dynamic functional connectivity: Recent findings and open  
489 questions. *NeuroImage* (May), 1–8.

- 490 Gratton, C., T. O. Laumann, A. N. Nielsen, D. J. Greene, E. M. Gordon, A. W. Gilmore, S. M. Nelson, R. S. Coalson, A. Z.  
491 Snyder, B. L. Schlaggar, N. U. F. Dosenbach, and S. E. Petersen (2018). Functional Brain Networks Are Dominated by  
492 Stable Group and Individual Factors, Not Cognitive or Daily Variation. *Neuron* 98(2), 439–452.e5.
- 493 Huntenburg, J. M., P.-L. Bazin, and D. S. Margulies (2018, January). Large-Scale Gradients in Human Cortical Organization.  
494 *Trends in Cognitive Sciences* 22(1), 21–31.
- 495 Ito, T., S. L. Brincat, M. Siegel, R. D. Mill, B. J. He, E. K. Miller, H. G. Rotstein, and M. W. Cole (2020, August). Task-evoked  
496 activity quenches neural correlations and variability across cortical areas. *PLOS Computational Biology* 16(8), e1007983.  
497 Publisher: Public Library of Science.
- 498 Ito, T. and J. D. Murray (2021, November). Multi-task representations in human cortex transform along a sensory-to-motor  
499 hierarchy. Technical report. Company: Cold Spring Harbor Laboratory Distributor: Cold Spring Harbor Laboratory Label:  
500 Cold Spring Harbor Laboratory Section: New Results Type: article.
- 501 Ji, J. L., J. Demšar, C. Fonteneau, Z. Tamayo, L. Pan, A. Kraljič, A. Matkovič, N. Purg, M. Helmer, S. Warrington, M. Harms,  
502 S. N. Sotiropoulos, J. D. Murray, A. Anticevic, and G. Repovš (2022, June). QuNex – An Integrative Platform for  
503 Reproducible Neuroimaging Analytics. Technical report, bioRxiv. Section: New Results Type: article.
- 504 Ji, J. L., M. Spronk, K. Kulkarni, G. Repovš, A. Anticevic, and M. W. Cole (2019). Mapping the human brain’s cortical-  
505 subcortical functional network organization. *NeuroImage* 185, 35–57.
- 506 Johnson, K. O. (1980, June). Sensory discrimination: neural processes preceding discrimination decision. *Journal of*  
507 *Neurophysiology* 43(6), 1793–1815. Publisher: American Physiological Society.
- 508 King, M., C. R. Hernandez-Castillo, R. A. Poldrack, R. B. Ivry, and J. Diedrichsen (2019, August). Functional boundaries  
509 in the human cerebellum revealed by a multi-domain task battery. *Nature Neuroscience* 22(8), 1371–1378. Number: 8  
510 Publisher: Nature Publishing Group.
- 511 Kohn, A., R. Coen-Cagli, I. Kanitscheider, and A. Pouget (2016, July). Correlations and Neuronal Population Information.  
512 *Annual Review of Neuroscience* 39(1), 237–256.
- 513 Krienen, F. M., B. T. T. Yeo, and R. L. Buckner (2014, September). Reconfigurable task-dependent functional coupling  
514 modes cluster around a core functional architecture. *Philosophical Transactions of the Royal Society B: Biological*  
515 *Sciences* 369(1653), 20130526–20130526.
- 516 Leavitt, M. L., F. Pieper, A. J. Sachs, and J. C. Martinez-Trujillo (2017, March). Correlated variability modifies working  
517 memory fidelity in primate prefrontal neuronal ensembles. *Proceedings of the National Academy of Sciences* 114(12),  
518 E2494–E2503. Publisher: National Academy of Sciences Section: PNAS Plus.
- 519 MacKay, D. J. C. (2003). *Information theory, inference and learning algorithms*. Cambridge university press.
- 520 Margulies, D. S., S. S. Ghosh, A. Goulas, M. Falkiewicz, J. M. Huntenburg, G. Langs, G. Bezgin, S. B. Eickhoff, F. X.  
521 Castellanos, M. Petrides, E. Jefferies, and J. Smallwood (2016, November). Situating the default-mode network along  
522 a principal gradient of macroscale cortical organization. *Proceedings of the National Academy of Sciences* 113(44),  
523 12574–12579.
- 524 Mars, R. B., R. E. Passingham, and S. Jbabdi (2018, November). Connectivity Fingerprints: From Areal Descriptions to  
525 Abstract Spaces. *Trends in Cognitive Sciences* 22(11), 1026–1037.
- 526 Mesulam, M. M. (1998, June). From sensation to cognition. *Brain* 121(6), 1013–1052.
- 527 Moreno-Bote, R., J. Beck, I. Kanitscheider, X. Pitkow, P. Latham, and A. Pouget (2014, September). Information-limiting  
528 correlations. *Nature Neuroscience* 17, 1410.
- 529 Murphy, K., R. M. Birn, D. A. Handwerker, T. B. Jones, and P. A. Bandettini (2009). The impact of global signal regression on  
530 resting state correlations: are anti-correlated networks introduced? *Neuroimage* 44(3), 893–905.
- 531 Ni, A. M., C. Huang, B. Doiron, and M. R. Cohen (2022, June). A general decoding strategy explains the relationship between  
532 behavior and correlated variability. *eLife* 11, e67258. Publisher: eLife Sciences Publications, Ltd.



- 533 Nozari, E., J. Stiso, L. Caciagli, E. J. Cornblath, X. He, M. A. Bertolero, A. S. Mahadevan, G. J. Pappas, and D. S. Bassett  
534 (2020, December). Is the brain macroscopically linear? A system identification of resting state dynamics. *arXiv:2012.12351*  
535 [*cs, eess, math, q-bio*]. arXiv: 2012.12351.
- 536 Palla, G., I. Derényi, I. Farkas, and T. Vicsek (2005, June). Uncovering the overlapping community structure of complex  
537 networks in nature and society. *Nature* 435(7043), 814–818. Number: 7043 Publisher: Nature Publishing Group.
- 538 Panzeri, S., M. Moroni, H. Sahaai, and C. D. Harvey (2022, June). The structures and functions of correlations in neural  
539 population codes. *Nature Reviews Neuroscience*, 1–17. Publisher: Nature Publishing Group.
- 540 Passingham, R. E., K. E. Stephan, and R. Kötter (2002, August). The anatomical basis of functional localization in the cortex.  
541 *Nature Reviews Neuroscience* 3(8), 606–616.
- 542 Pinto, L., K. Rajan, B. DePasquale, S. Y. Thiberge, D. W. Tank, and C. D. Brody (2019, September). Task-Dependent Changes  
543 in the Large-Scale Dynamics and Necessity of Cortical Regions. *Neuron* 0(0).
- 544 Power, J. D., A. L. Cohen, S. M. Nelson, G. S. Wig, K. A. Barnes, J. a. Church, A. C. Vogel, T. O. Laumann, F. M. Miezin,  
545 B. L. Schlaggar, and S. E. Petersen (2011). Functional Network Organization of the Human Brain. *Neuron* 72(4), 665–678.
- 546 Raichle, M. E., A. M. MacLeod, A. Z. Snyder, W. J. Powers, D. A. Gusnard, and G. L. Shulman (2001). A default mode of  
547 brain function. *Proceedings of the National Academy of Sciences of the United States of America* 98(2), 676–82.
- 548 Reid, A. T., D. B. Headley, R. D. Mill, R. Sanchez-Romero, L. Q. Uddin, D. Marinazzo, D. J. Lurie, P. A. Valdés-Sosa, S. J.  
549 Hanson, B. B. Biswal, V. Calhoun, R. A. Poldrack, and M. W. Cole (2019, November). Advancing functional connectivity  
550 research from association to causation. *Nature Neuroscience* 22(11), 1751–1760.
- 551 Rissman, J., A. Gazzaley, and M. D’Esposito (2004). Measuring functional connectivity during distinct stages of a cognitive  
552 task. *NeuroImage* 23(2), 752–763.
- 553 Rubinov, M. and O. Sporns (2010). Complex network measures of brain connectivity: Uses and interpretations. *NeuroIm-*  
554 *age* 52(3), 1059–1069.
- 555 Rubinov, M. and O. Sporns (2011, June). Weight-conserving characterization of complex functional brain networks. *NeuroIm-*  
556 *age* 56(4), 2068–79.
- 557 Sanchez-Romero, R. and M. W. Cole (2021, February). Combining Multiple Functional Connectivity Methods to Improve  
558 Causal Inferences. *Journal of Cognitive Neuroscience* 33(2), 180–194.
- 559 Shine, J. M., P. G. Bissett, P. T. Bell, O. Koyejo, J. H. Balsters, K. J. Gorgolewski, C. A. Moodie, and R. A. Poldrack (2016).  
560 The Dynamics of Functional Brain Networks: Integrated Network States during Cognitive Task Performance. *Neuron* 92(2),  
561 544–554.
- 562 Sizemore, A. E., C. Giusti, A. Kahn, J. M. Vettel, R. F. Betzel, and D. S. Bassett (2018, February). Cliques and cavities in the  
563 human connectome. *Journal of Computational Neuroscience* 44(1), 115–145.
- 564 Smith, S. M., P. T. Fox, K. L. Miller, D. C. Glahn, P. M. Fox, C. E. Mackay, N. Filippini, K. E. Watkins, R. Toro, A. R.  
565 Laird, and C. F. Beckmann (2009, August). Correspondence of the brain’s functional architecture during activation and rest.  
566 *Proceedings of the National Academy of Sciences of the United States of America* 106(31), 13040–13045.
- 567 Spronk, M., B. P. Keane, T. Ito, K. Kulkarni, J. L. Ji, A. Anticevic, and M. W. Cole (2021, January). A Whole-Brain and  
568 Cross-Diagnostic Perspective on Functional Brain Network Dysfunction. *Cerebral Cortex* 31(1), 547–561.
- 569 Varoquaux, G. (2018, October). Cross-validation failure: Small sample sizes lead to large error bars. *NeuroImage* 180, 68–77.
- 570 Vos de Wael, R., O. Benkarim, C. Paquola, S. Lariviere, J. Royer, S. Tavakol, T. Xu, S.-J. Hong, G. Langs, S. Valk, B. Misic,  
571 M. Milham, D. Margulies, J. Smallwood, and B. C. Bernhardt (2020, March). BrainSpace: a toolbox for the analysis of  
572 macroscale gradients in neuroimaging and connectomics datasets. *Communications Biology* 3(1), 1–10. Number: 1 Publisher:  
573 Nature Publishing Group.
- 574 Waskom, M. L. (2021). Seaborn: statistical data visualization. *Journal of Open Source Software* 6(60), 3021.
- 575 Wig, G. S. (2017). Segregated Systems of Human Brain Networks. *Trends in Cognitive Sciences* xx, 1–16.

- 576 Yeo, B. T., F. M. Krienen, J. Sepulcre, M. R. Sabuncu, D. Lashkari, M. Hollinshead, J. L. Roffman, J. W. Smoller, L. Zollei,  
577 J. R. Polimeni, B. Fischl, H. Liu, and R. L. Buckner (2011, September). The organization of the human cerebral cortex  
578 estimated by intrinsic functional connectivity. *Journal of Neurophysiology* 106(3), 1125–1165.
- 579 Yeo, B. T. T., F. M. Krienen, S. B. Eickhoff, S. N. Yaakub, P. T. Fox, R. L. Buckner, C. L. Asplund, and M. W. L. Chee (2015).  
580 Functional specialization and flexibility in human association cortex. *Cerebral Cortex* 25(10), 3654–3672.

## 581 **Acknowledgements**

582 This project was supported by NIH grant R01MH112746 (JDM), NSF NeuroNex grant 2015276 (JDM), and a Swartz  
583 Foundation Fellowship (TI). The authors acknowledge the Yale Center for Research Computing at Yale University for providing  
584 access to the Grace cluster and associated research computing resources.

585 **Supplementary Figures**

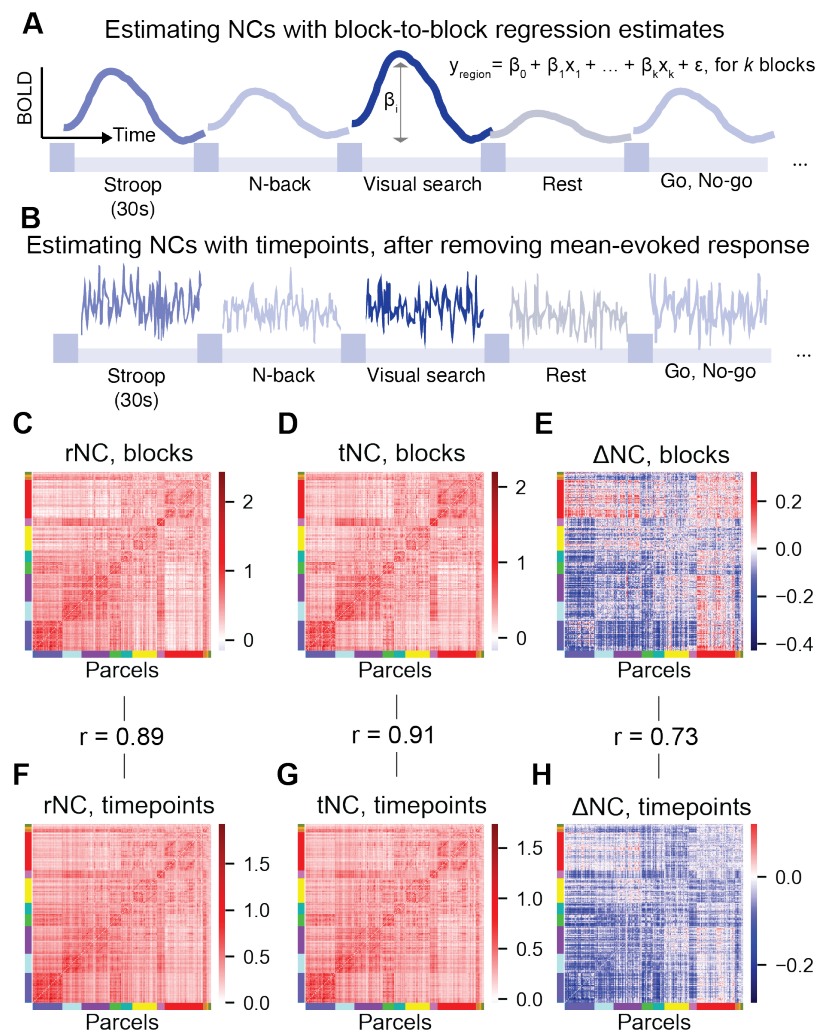

**Supplementary Figure 1.** NCs computed using block-to-block activity estimates versus timepoint-to-timepoint estimates reveal quantitatively similar NC estimates. a) To estimate NCs using block-to-block estimates, we performed a beta series regression. In a beta series regression, every block (or trial) has its own independent regressor. Every block/trial therefore has its own activity estimate. (Image is a schematic.) b) To compare NCs using the more traditional approach, we estimated NCs using correlations estimated across timepoints within task blocks. To ensure task-driven variance/noise was not conflated with the mean-evoked (i.e., signal) response, we performed a finite impulse response model across all blocks for each task type separately (Cole et al., 2019). This ensured that NCs were computed using the background task-driven variance. c) The rNC matrix computed using rest blocks (as implemented in the main text). d) The tNC matrix computed using task blocks, averaged across all tasks (as implemented in the main text). e) The  $\Delta$ NC matrix using block-wise NC estimates (as implemented in the main text). f) The rNC matrix computed as the correlation across timepoints. Resting-state blocks were first concatenated across all imaging sessions for a participant. The rNC was then computed on the concatenated time series. g) The tNC matrix computed as the correlation across timepoints. Blocks for each unique task were first concatenated for each participant. tNC was computed for each task, and then averaged across all tasks to obtain a task-general NC matrix. h) The  $\Delta$ NC matrix using timepoint-to-timepoint NC estimates. Despite being computed using different approaches (with varying amounts of data per NC), rNCs ( $r=0.89$ ), tNCs ( $r=0.91$ ), and  $\Delta$ NCs ( $r=0.73$ ) were highly similar across these approaches.

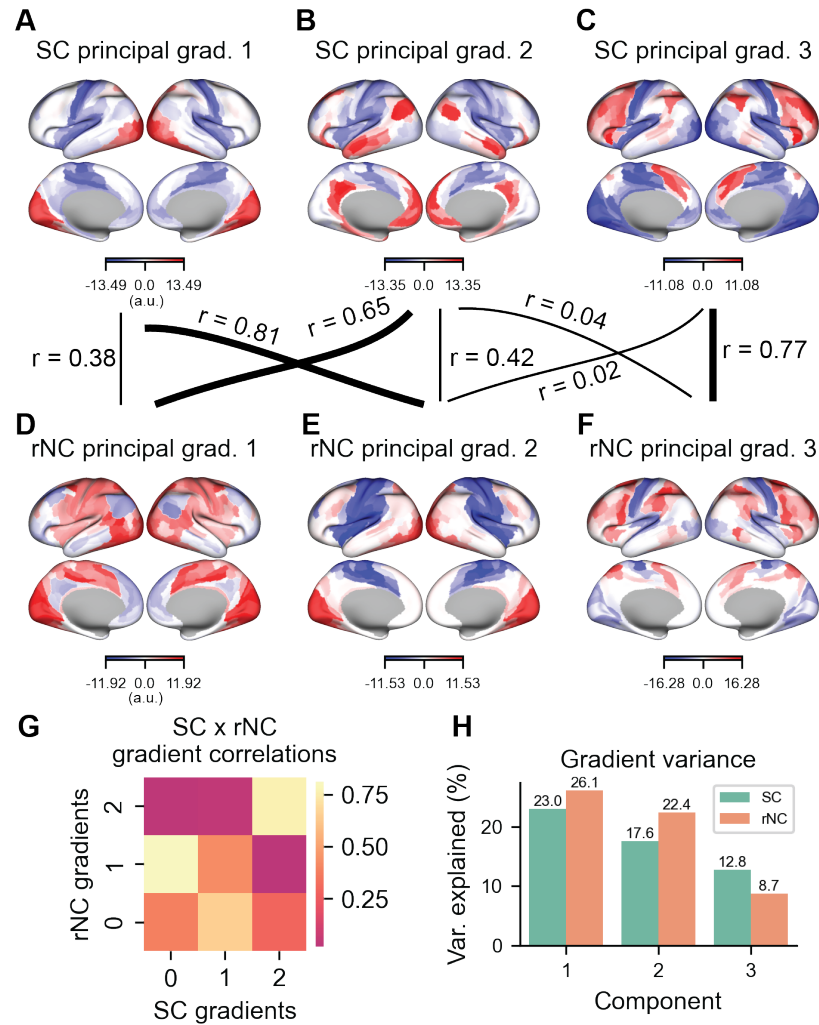

**Supplementary Figure 2.** Detailed comparison of the first three SC and rNC gradients. a) The first, b) second, and c) third SC gradient. d) The first rNC gradient, which has highest similarity to the second SC gradient. e) The second rNC gradient, which has highest similarity to the first SC gradient. f) The third rNC gradient, which has greatest similarity to the third SC gradient. Together, these findings suggest that the first three dimensions of SC and rNC are similar, but that the first two components are flipped in SC and rNC. Note that correlation values reflect the absolute value, since the orientation of PCA loadings are arbitrary. g) All pairwise correlations (absolute value) between the first three SC and rNC gradients. h) The variance explained of each gradient (principal component) for each SC and rNC matrix.

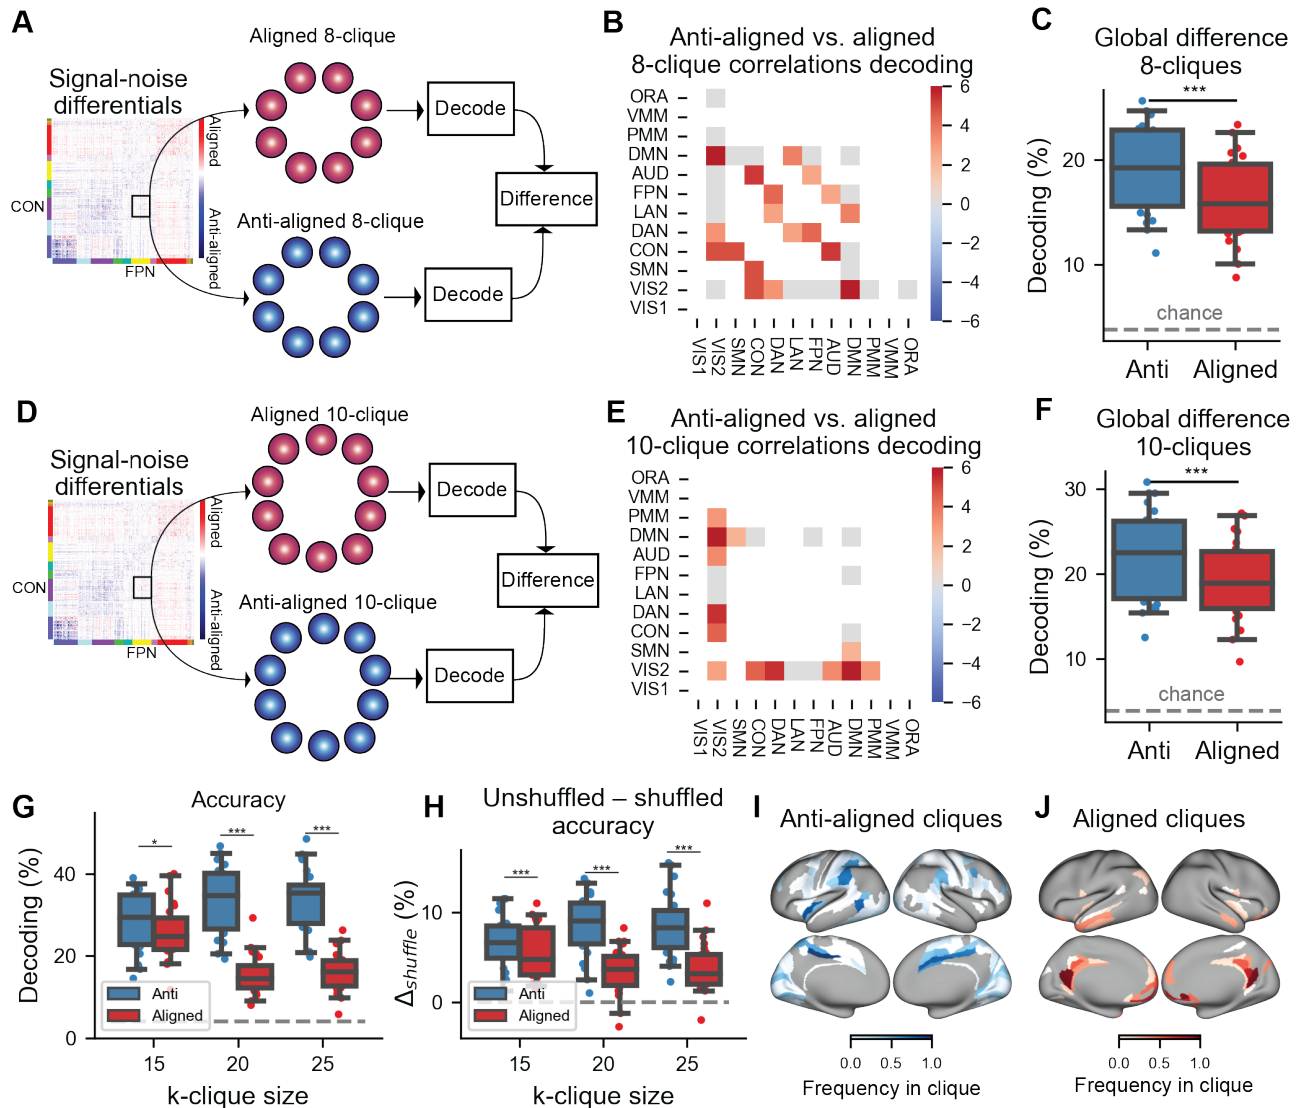

**Supplementary Figure 3.** Decoding analyses for different k-clique sizes – supplementary analyses for Fig. 6. a) Identifying 8-cliques within every pair of networks. b) Decoding accuracies for anti-aligned versus aligned 8-cliques for every pair of networks. Note that gray matrix elements indicate non-significant differences, and white elements indicate non-testable network configurations (due to non-existence of anti-aligned and/or aligned cliques of that size). c) Anti-aligned versus aligned decoding accuracies, averaged across all available network pairs. d-f) Same as a-c, but using 10-cliques. g) Decoding accuracies for 15, 20 (in the main text), and 25 anti-aligned and aligned cliques identified across the entire cortex. Anti-aligned cliques consistently had greater decoding accuracies than aligned cliques. h) The difference between unshuffled and shuffled decoding accuracies for anti-aligned and aligned cliques. Removing NCs impacted anti-aligned cliques significantly more than aligned cliques. i) We identified all possible 20-cliques for anti-aligned and j) aligned NCs, and plotted the frequency with which each region appeared in all cliques. Anti-aligned cliques tended to reside in sensory and motor areas, while aligned cliques were most frequently observed in medial prefrontal and posterior cingulate areas. (\*\*\*) indicates  $p < 0.0001$ ; \*\* indicates  $p < 0.001$ ; \* indicates  $p < 0.05$ )
